# Supplementary material
Source: ML conference proceedings conference paper supplement (https://openreview.net/forum?id=S3NOX_Ij9xc)

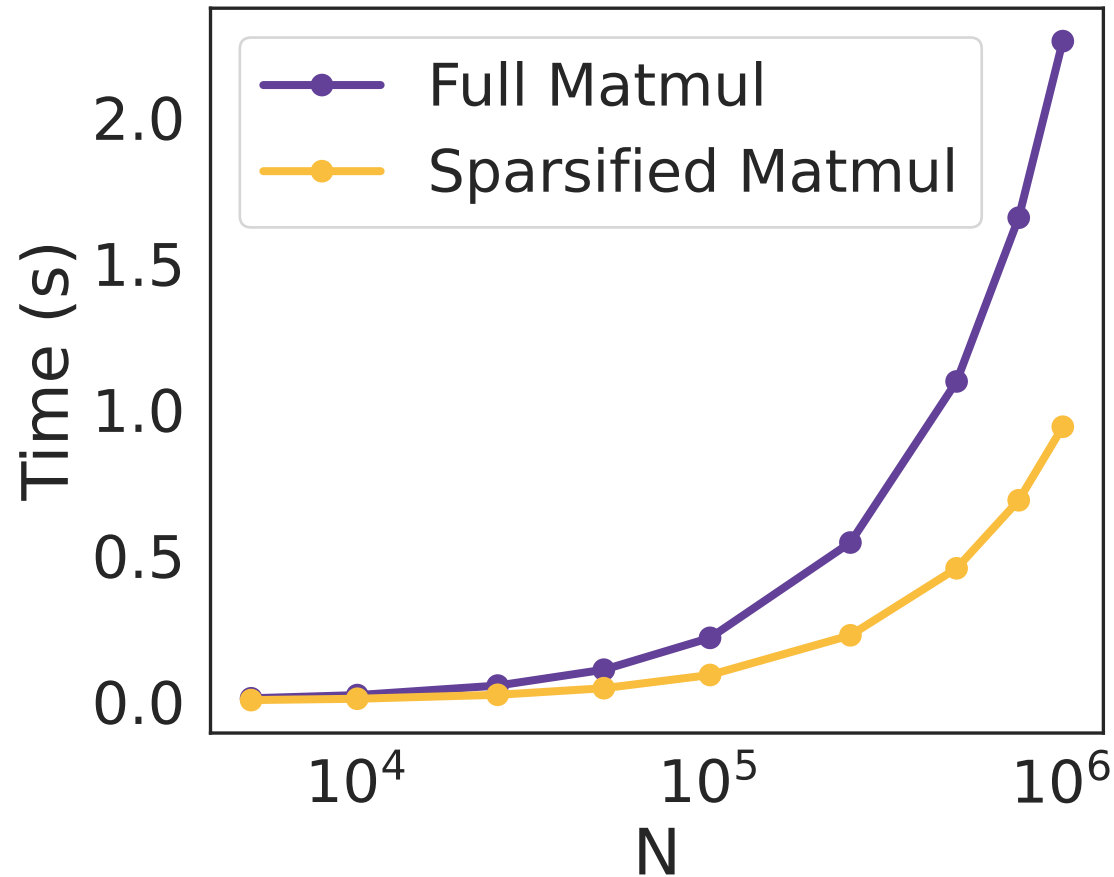

Supplement: supplementary_material [file attachment]

Residual Norm

- GPYtorch CG, Half
- Stable CG, Half
- GPYtorch CG, Float

0

20

40

Iterations

15

10

5

0

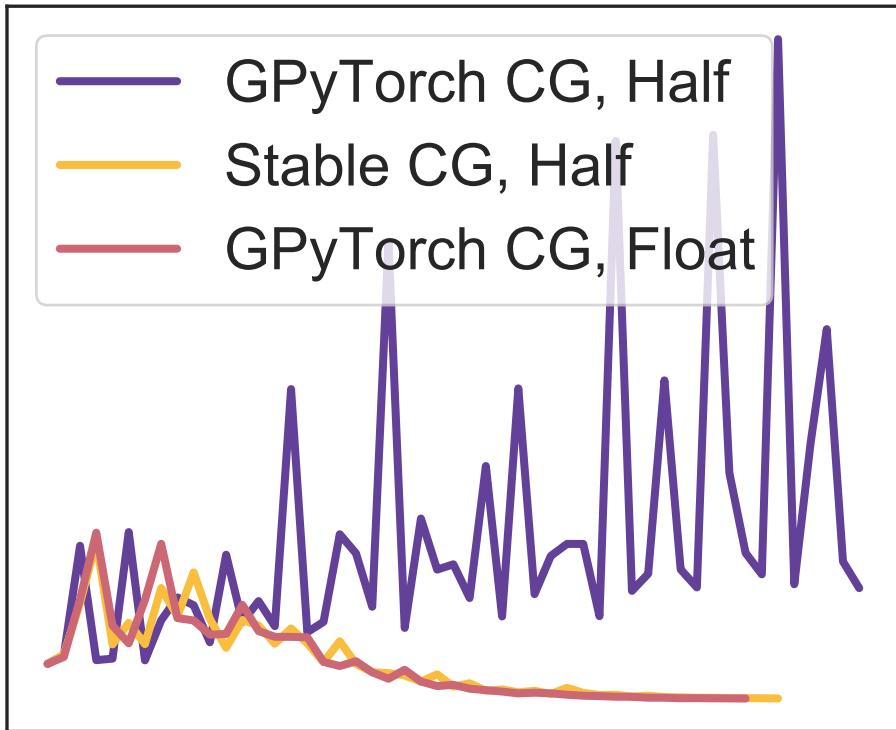

Supplement: supplementary_material [file attachment]

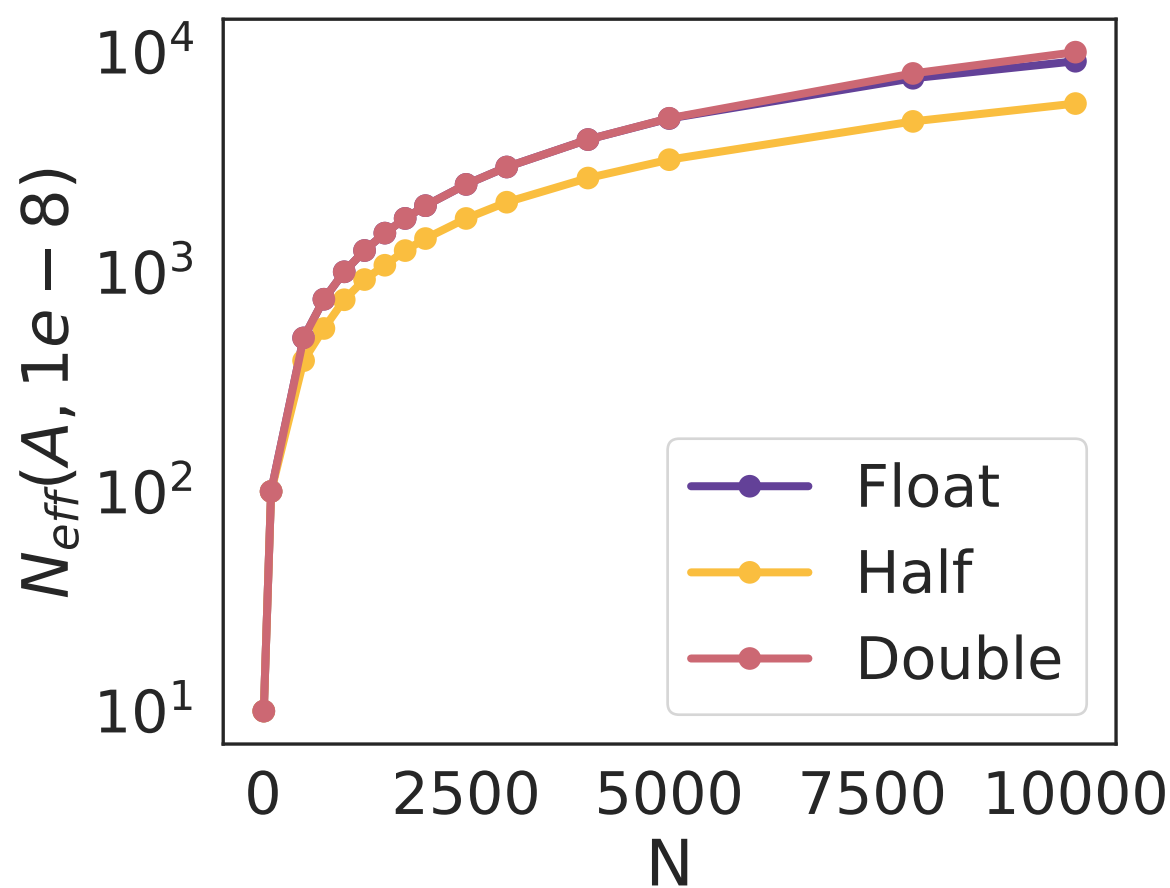

Supplement: supplementary_material [file attachment]

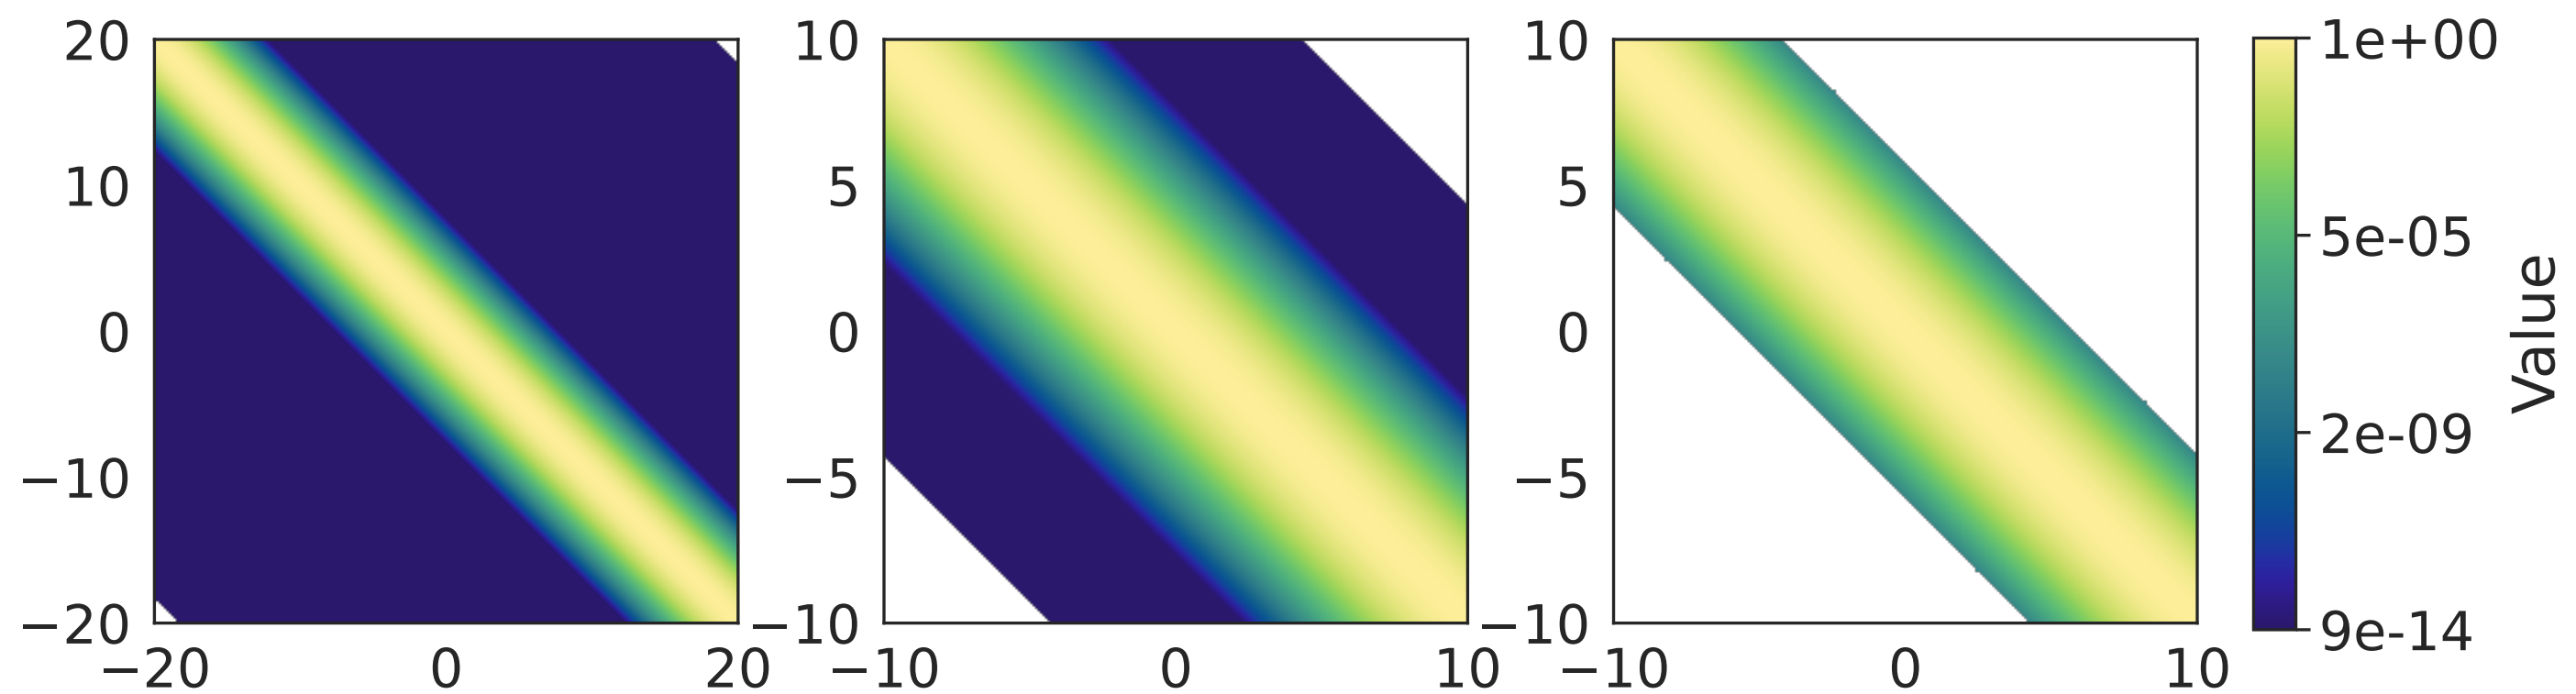

Supplement: supplementary_material [file attachment]

Max. Distance

$10^{59}$   
 $10^{47}$   
 $10^{35}$   
 $10^{23}$   
 $10^{11}$   
 $10^{-1}$

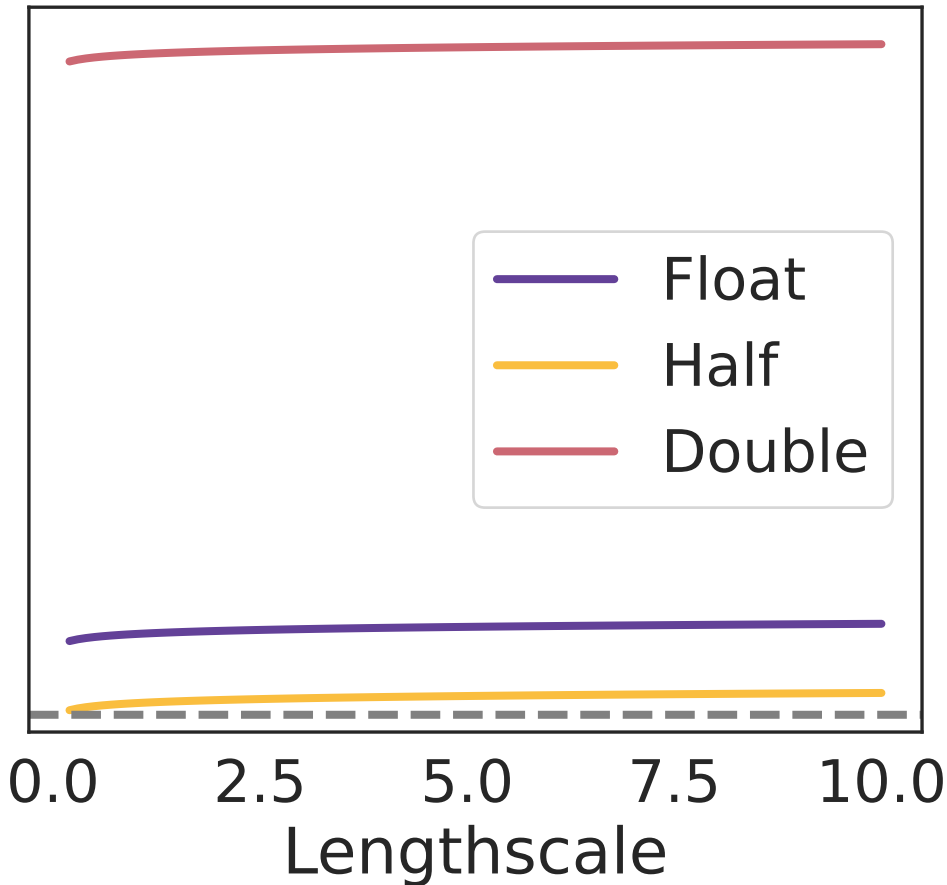

Supplement: supplementary_material [file attachment]

## Buzz

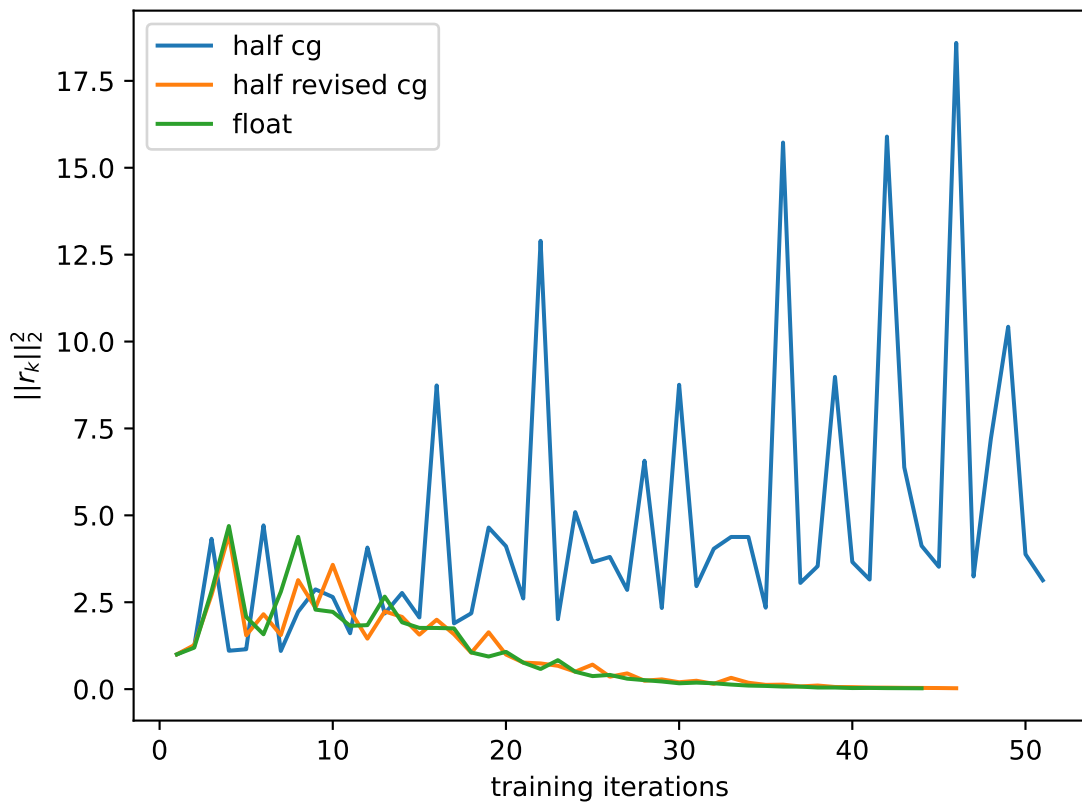

Supplement: supplementary_material [file attachment]

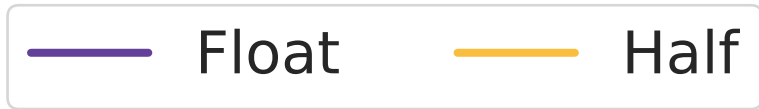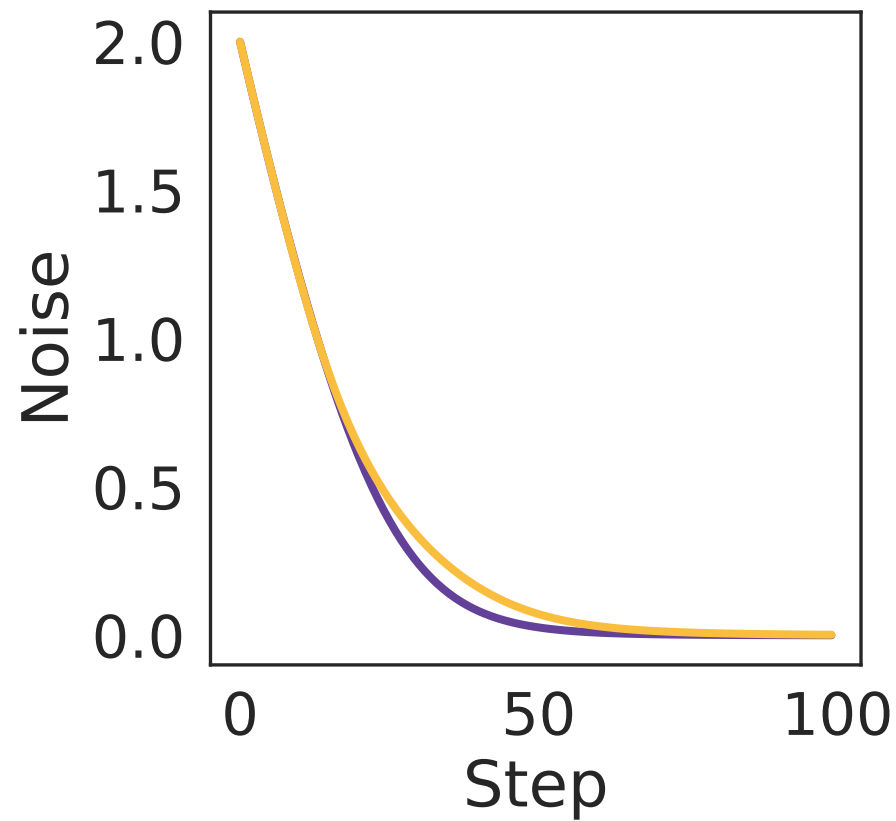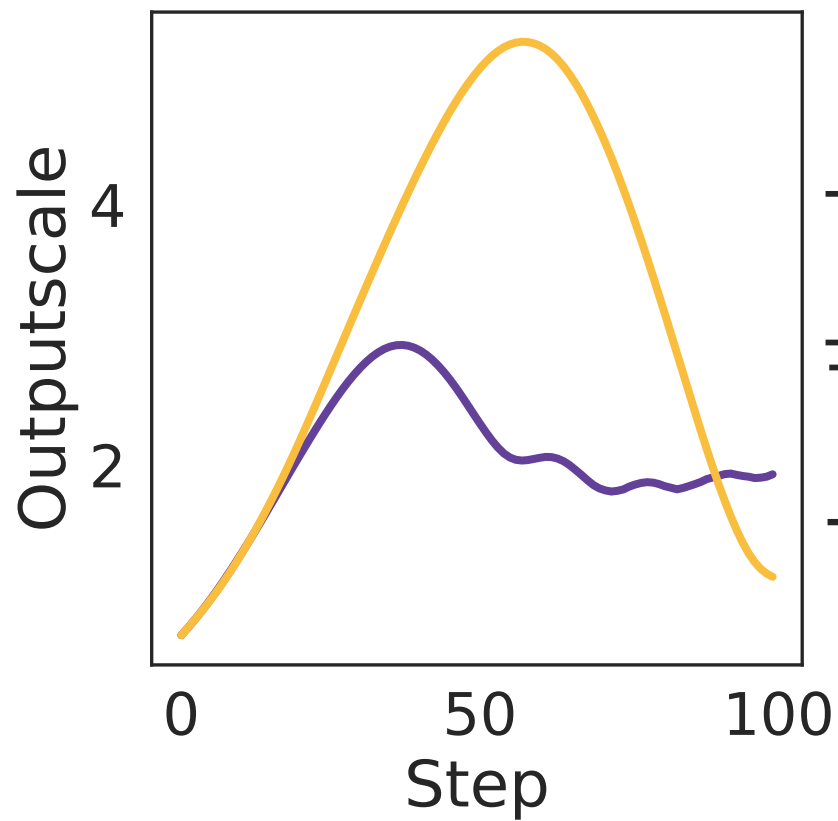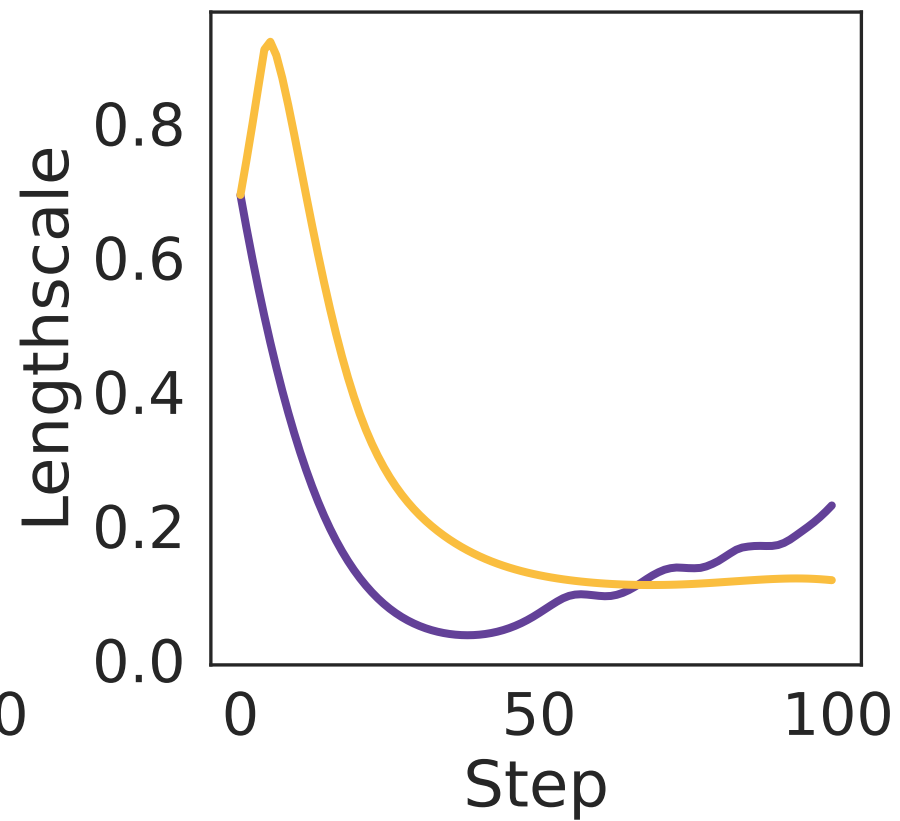

Supplement: supplementary_material [file attachment]

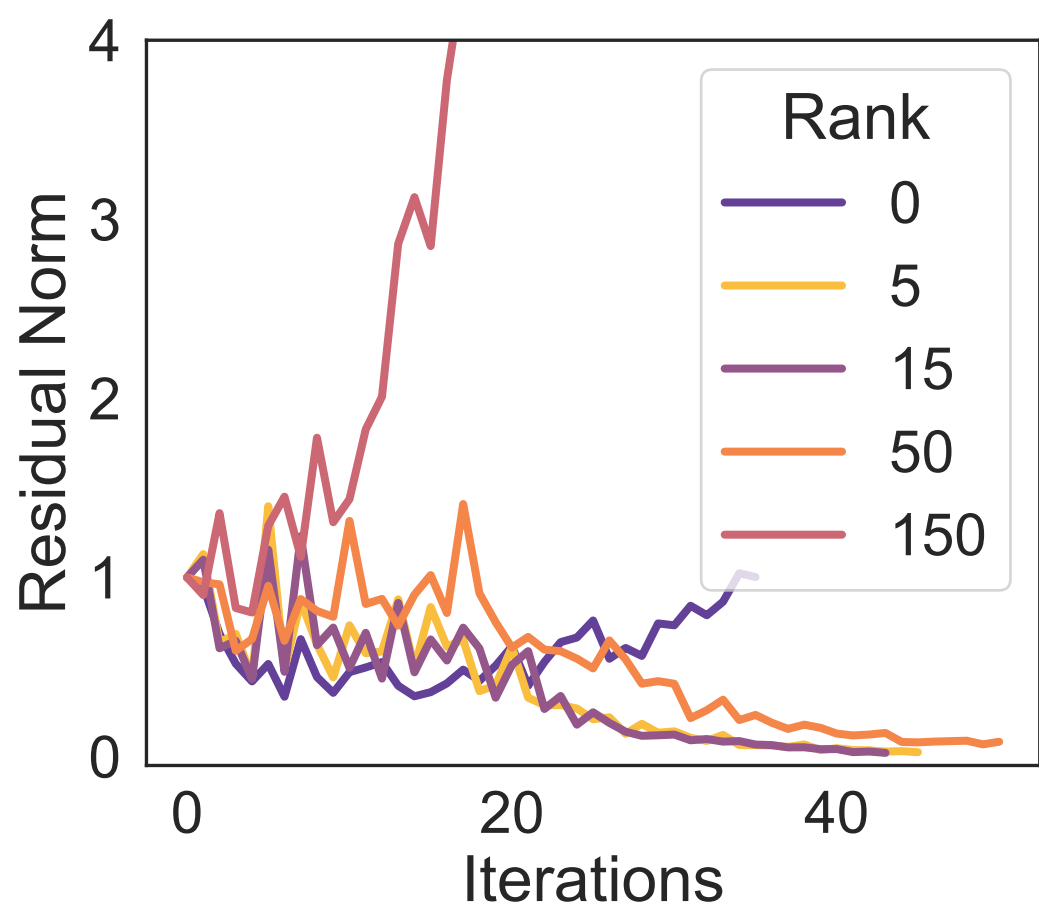

Supplement: supplementary_material [file attachment]

Residual Norm

2.5

2.0

1.5

1.0

0.5

0.0

0

20

40

Iterations

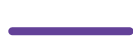

GPyTorch CG, Half

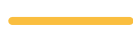

Stable CG, Half

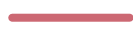

GPyTorch CG, Float

Supplement: supplementary_material [file attachment]

## Buzz

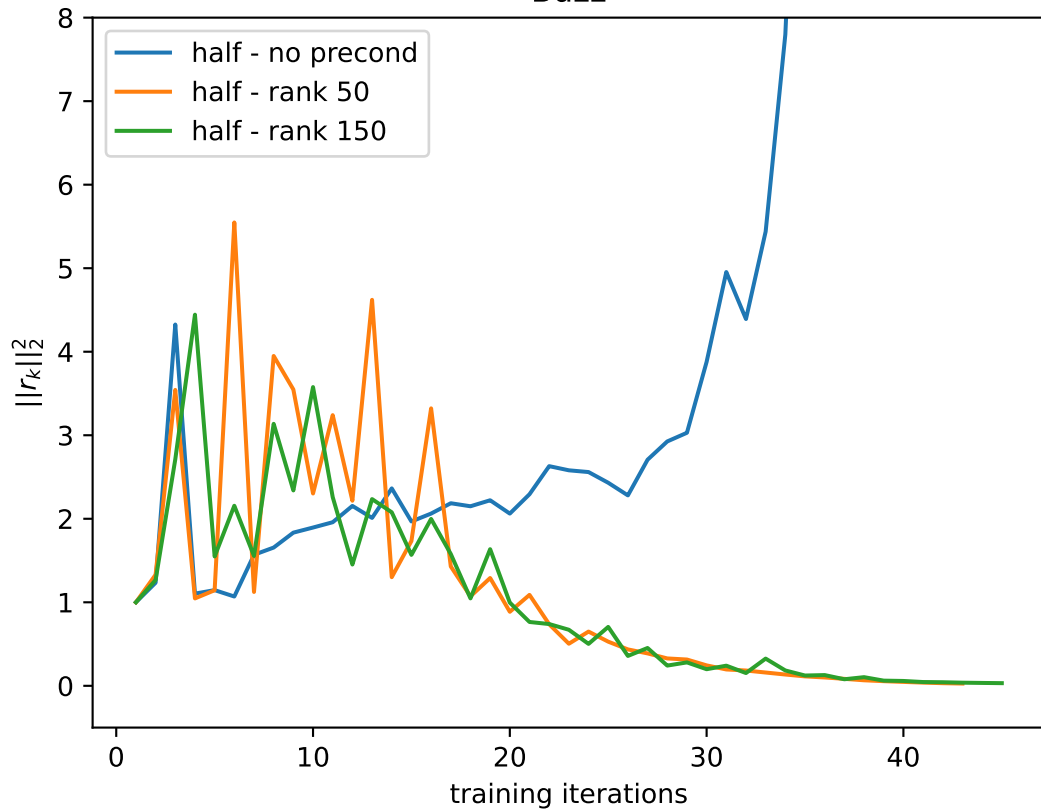

Supplement: supplementary_material [file attachment]

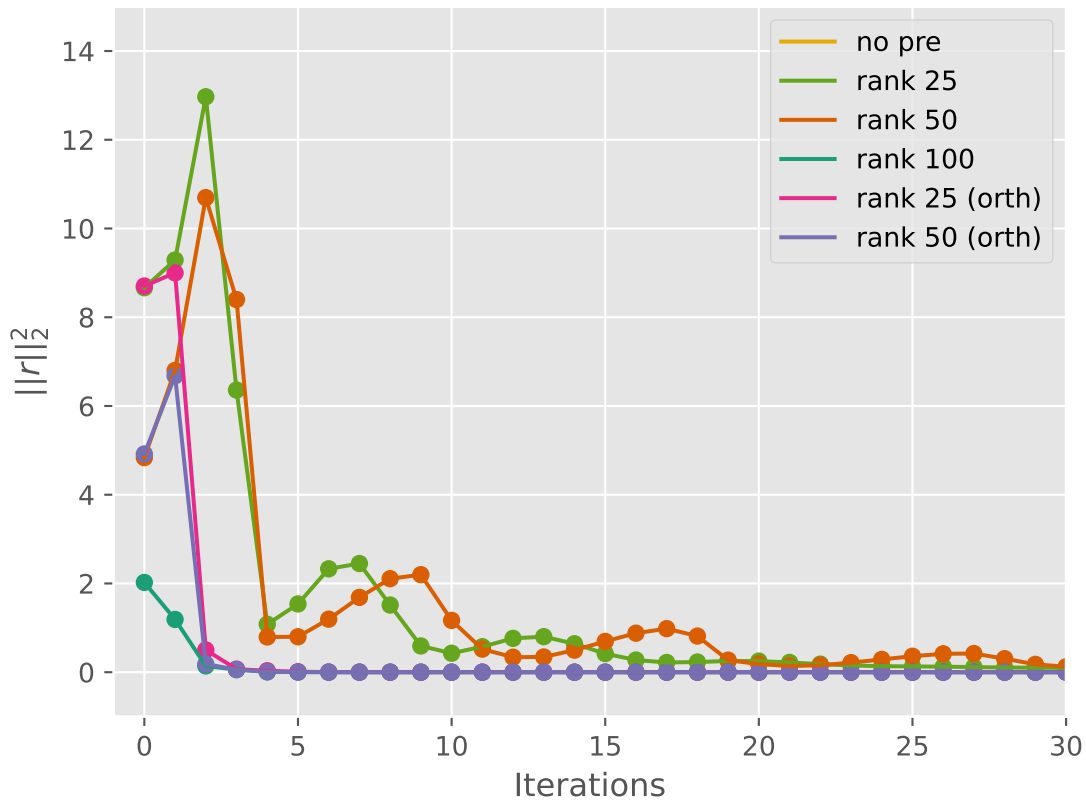

Supplement: supplementary_material [file attachment]

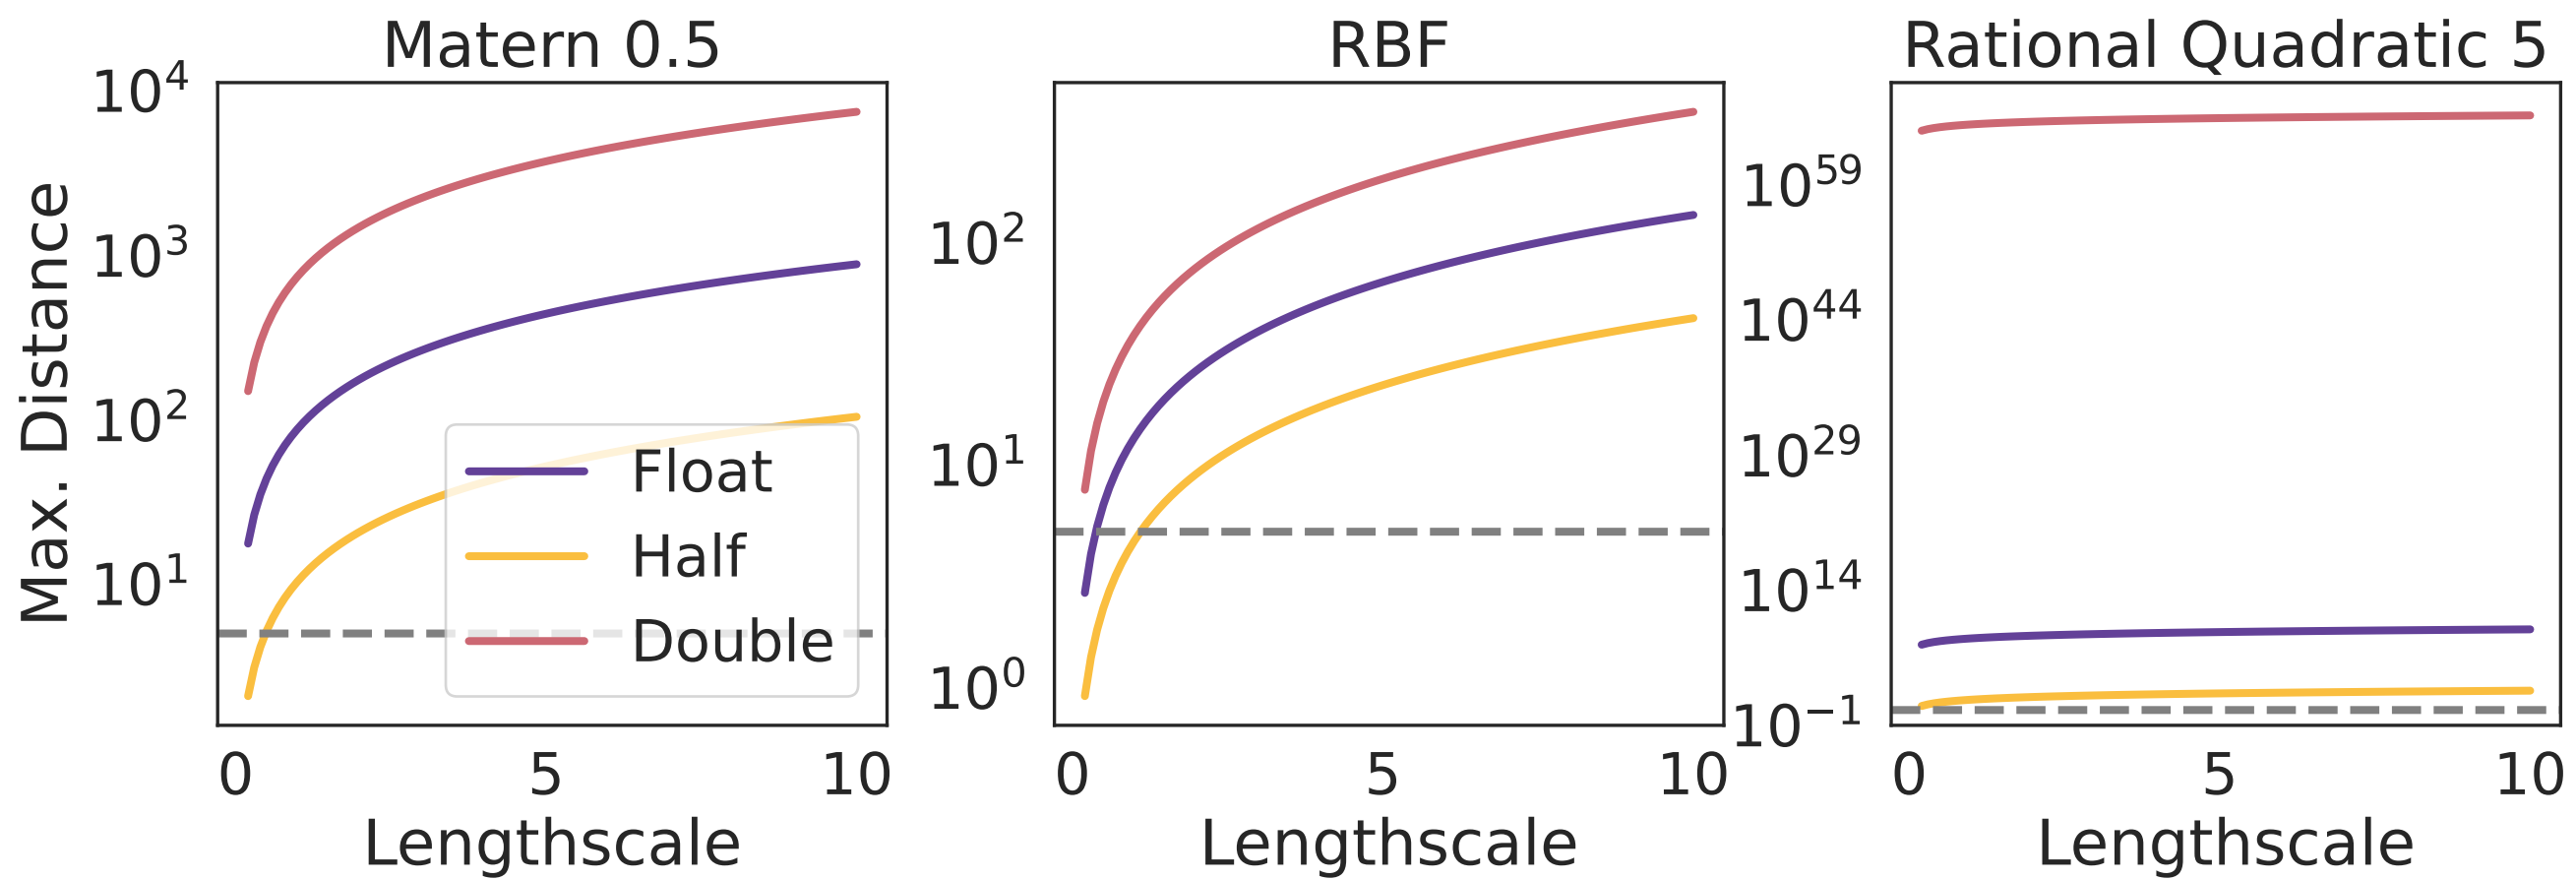

Supplement: supplementary_material [file attachment]

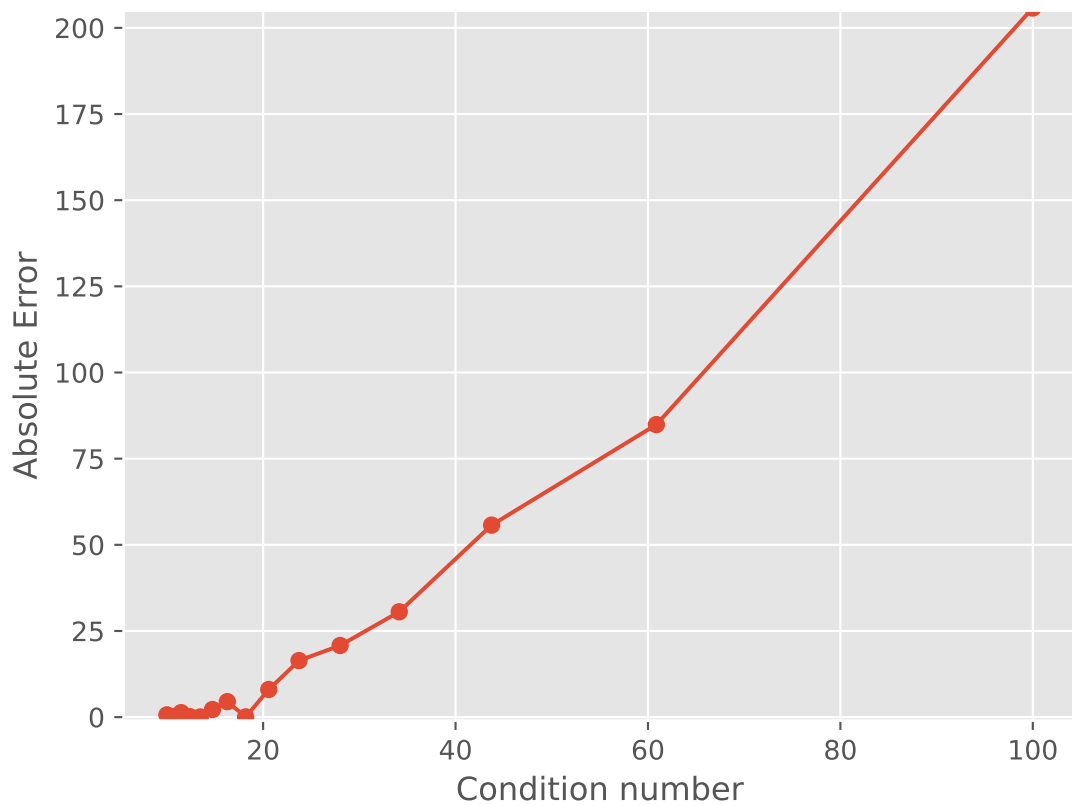

Supplement: supplementary_material [file attachment]

Relative Error

0.04  
0.02  
0.00  
-0.02  
-0.04

$10^3$

$10^4$

$10^5$

$10^6$

N

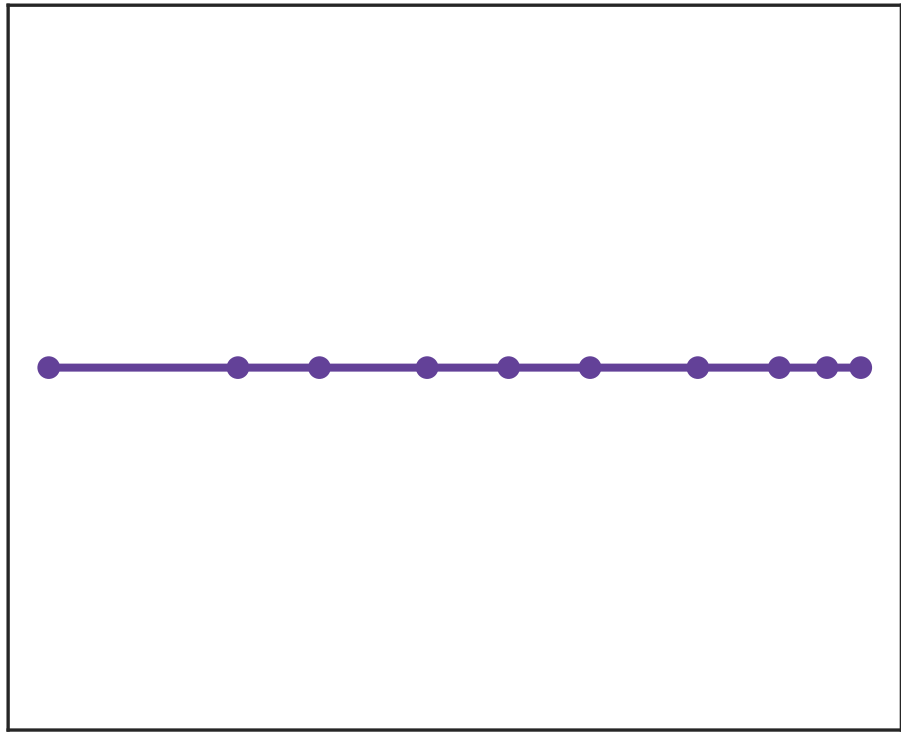

Supplement: supplementary_material [file attachment]

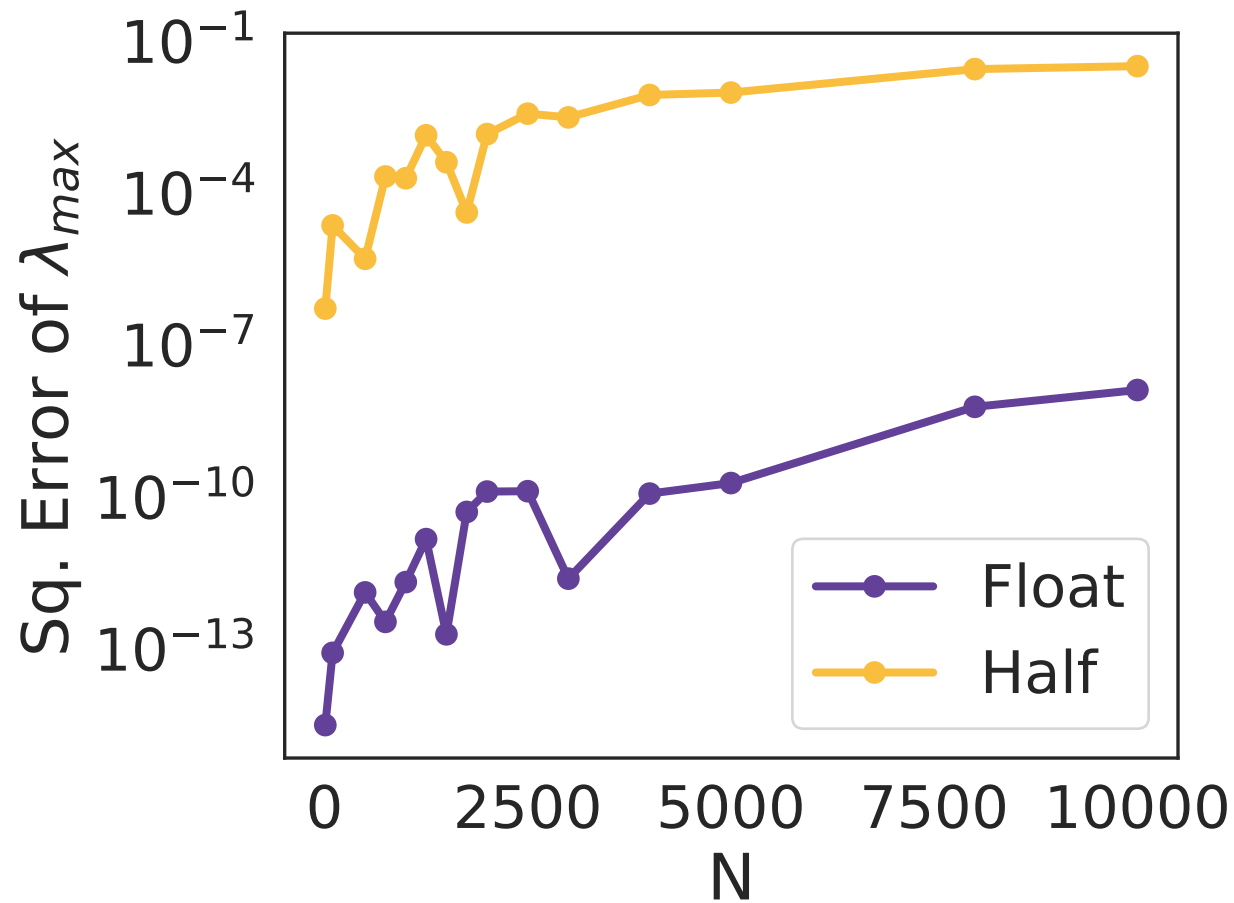

Supplement: supplementary_material [file attachment]

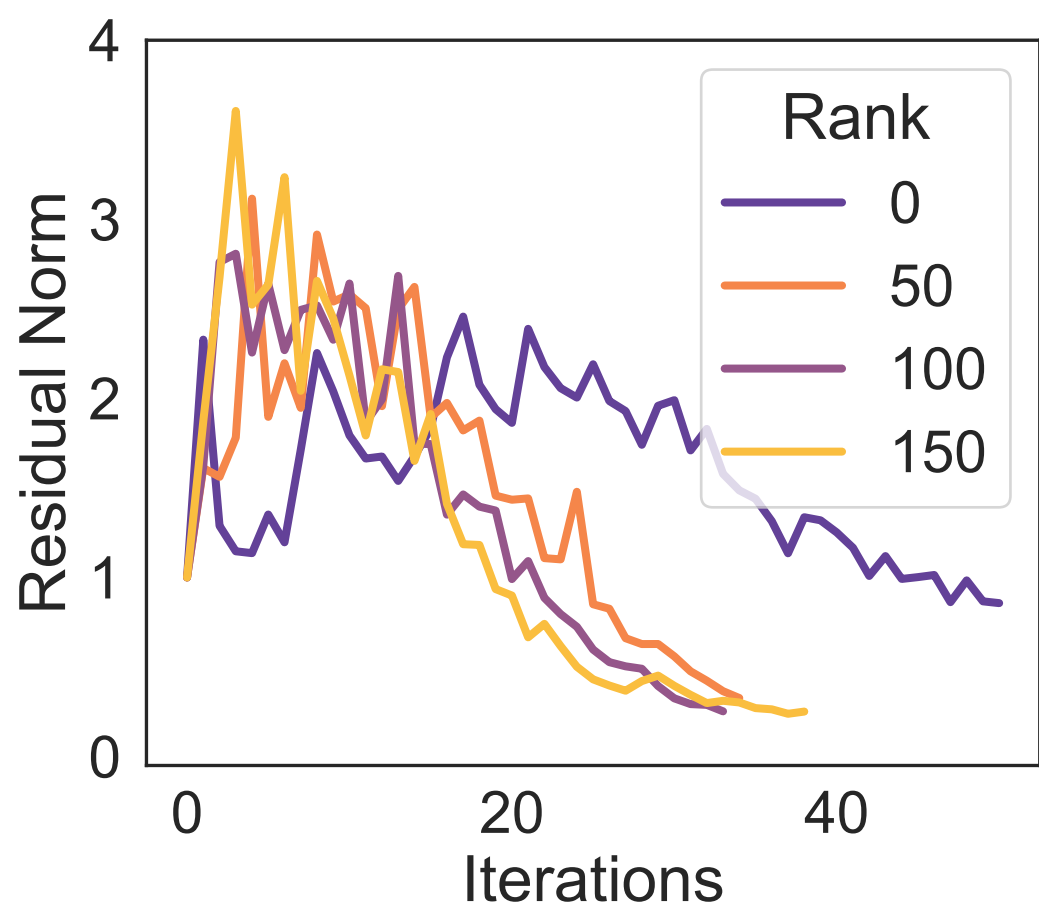

Supplement: supplementary_material [file attachment]

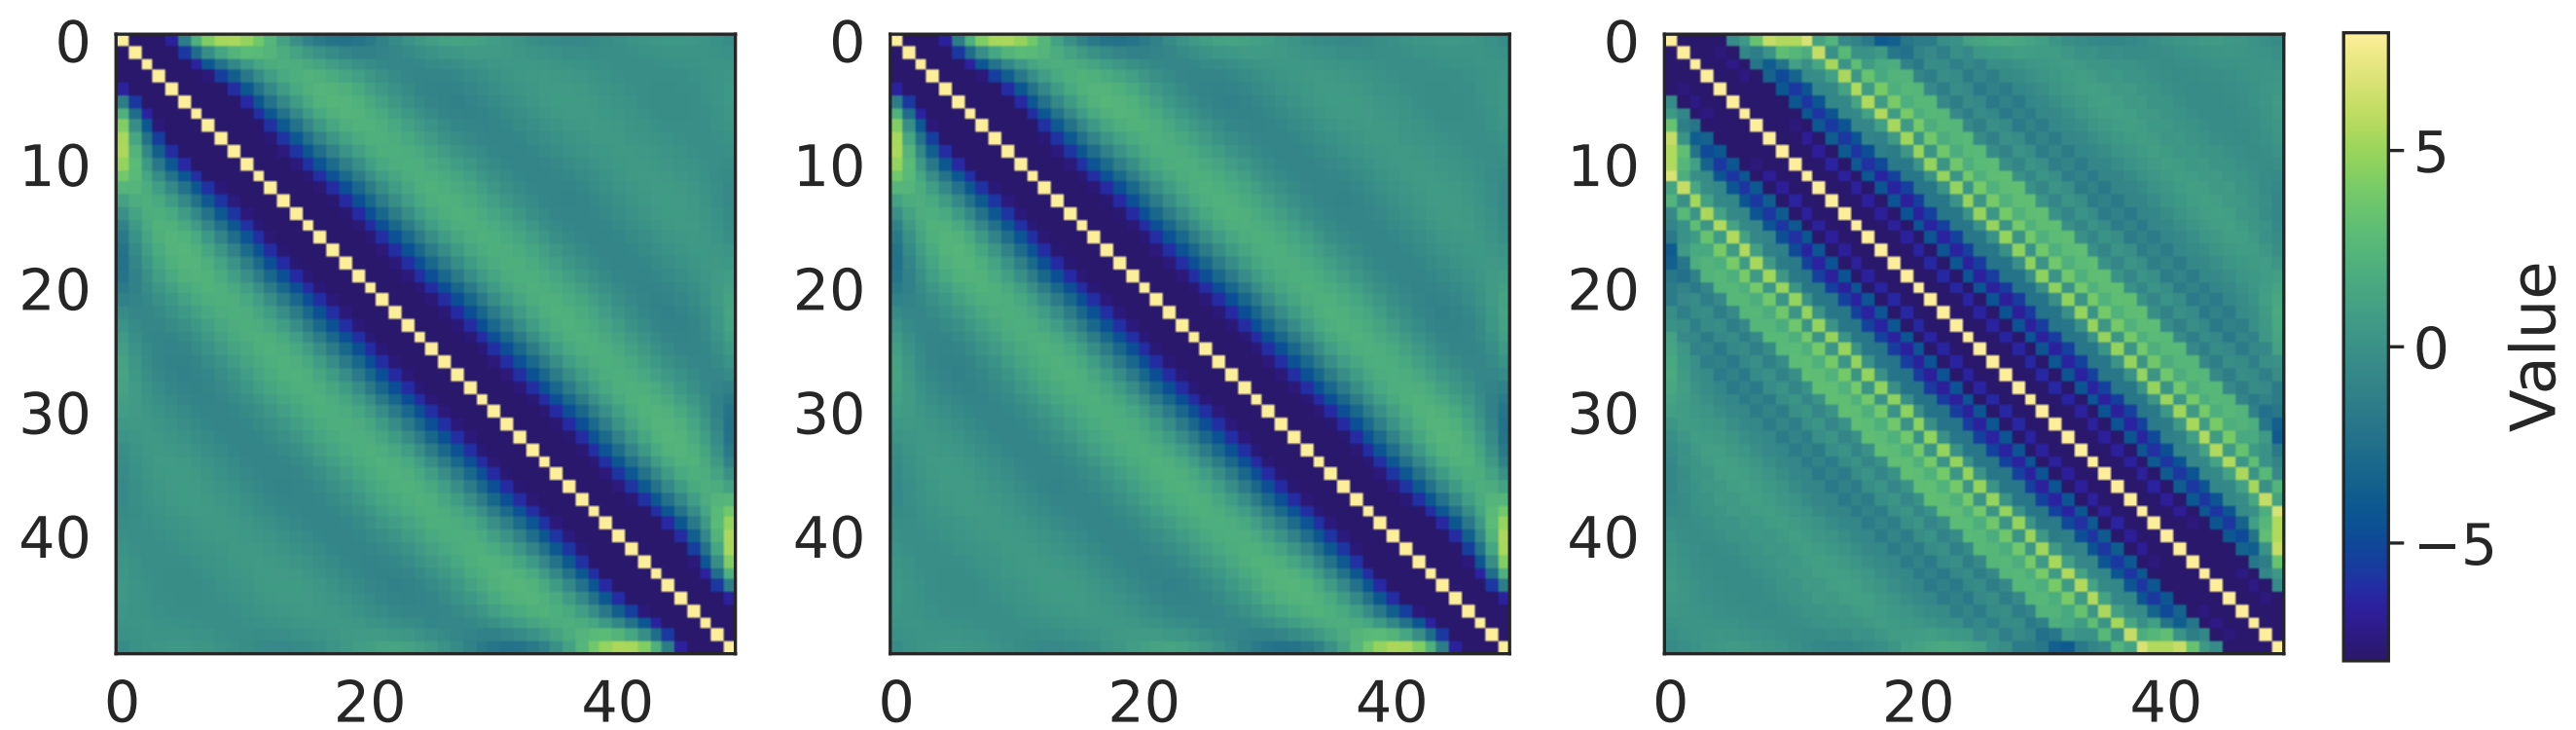

Supplement: supplementary_material [file attachment]

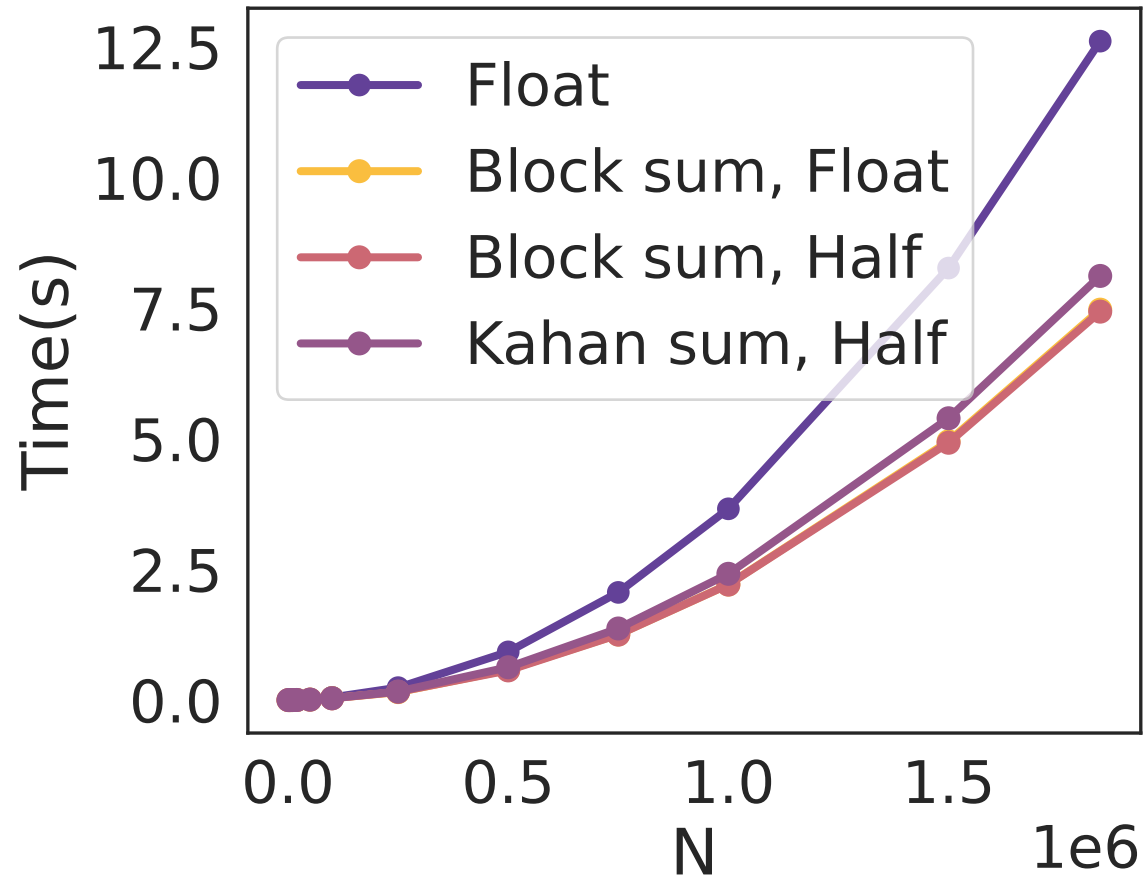

Supplement: supplementary_material [file attachment]

## Elevators

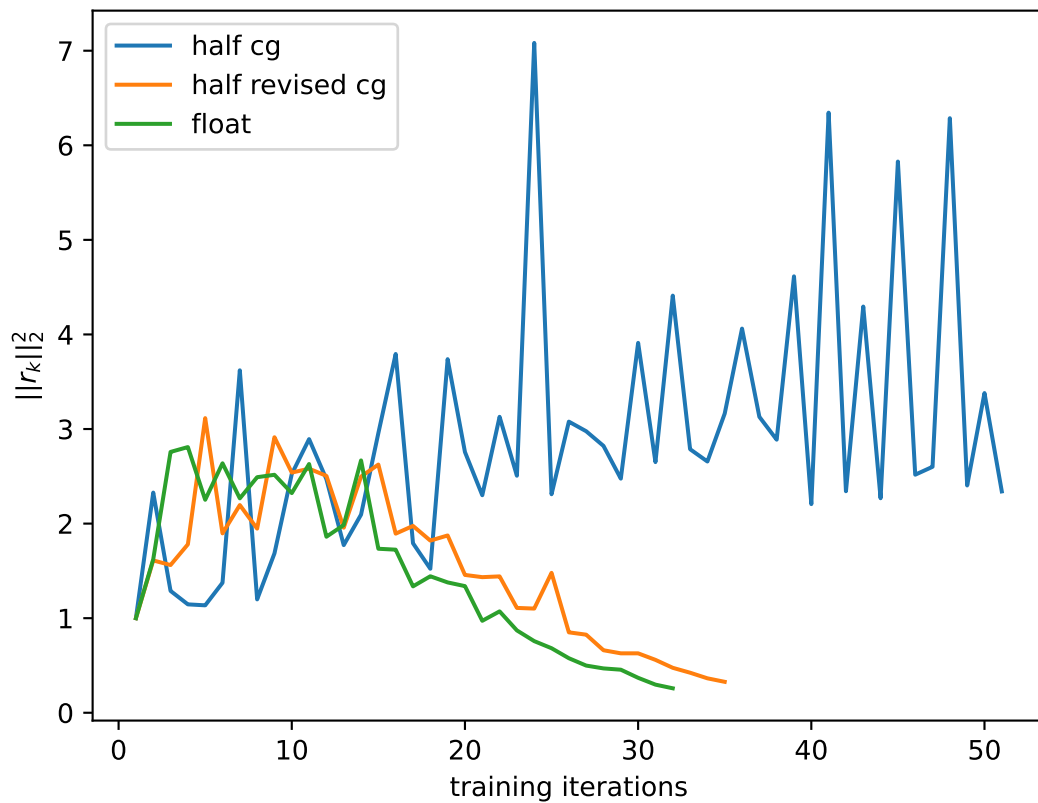

Supplement: supplementary_material [file attachment]

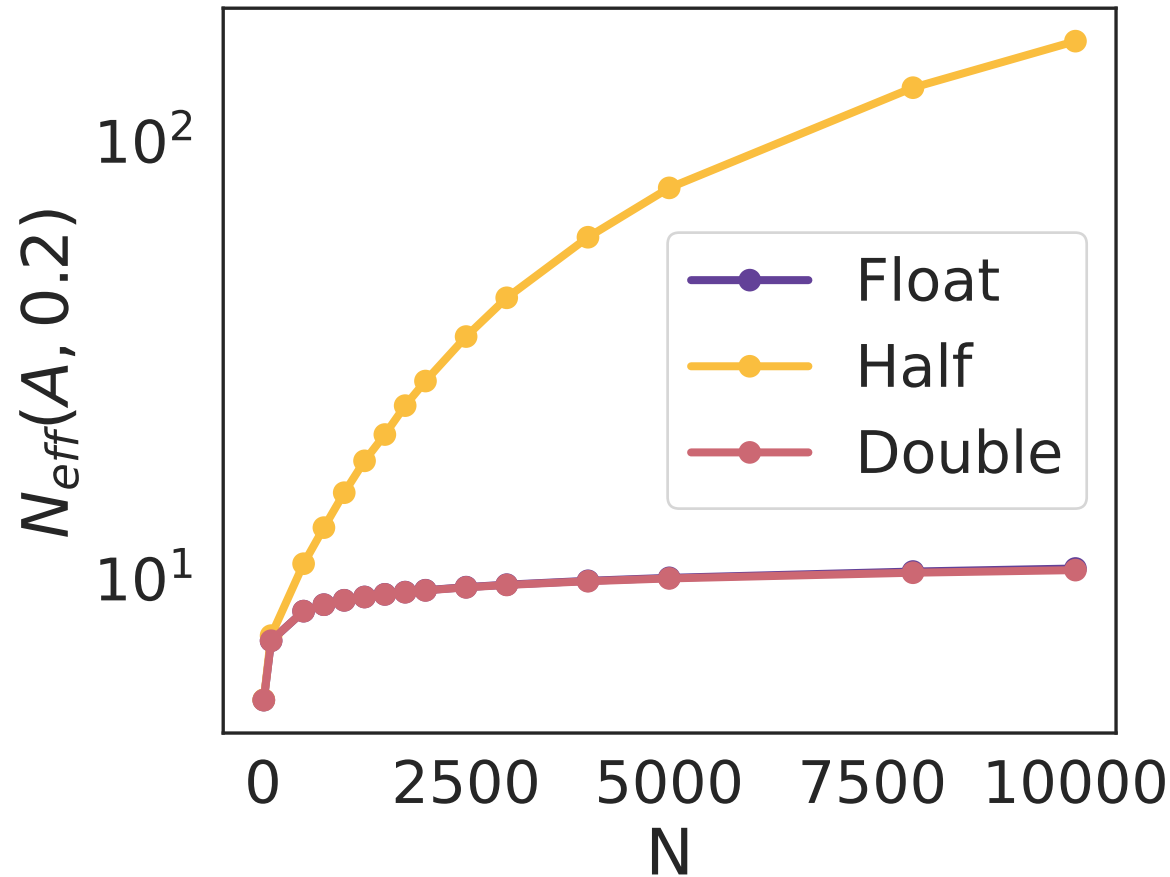

Supplement: supplementary_material [file attachment]

Residual Norm

$10^0$   
 $10^{-1}$   
 $10^{-2}$

0

20

40

Iterations

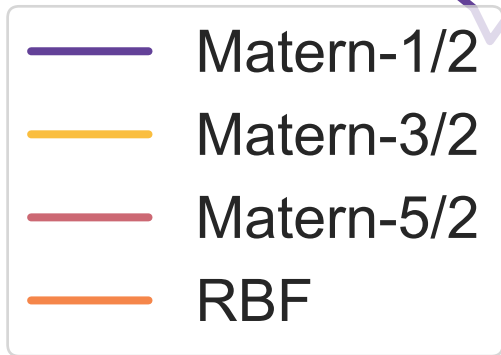

Supplement: supplementary_material [file attachment]

Residual Norm

- GPyTorch CG, Half
- Stable CG, Half
- GPyTorch CG, Float

6

4

2

0

0

20

40

Iterations

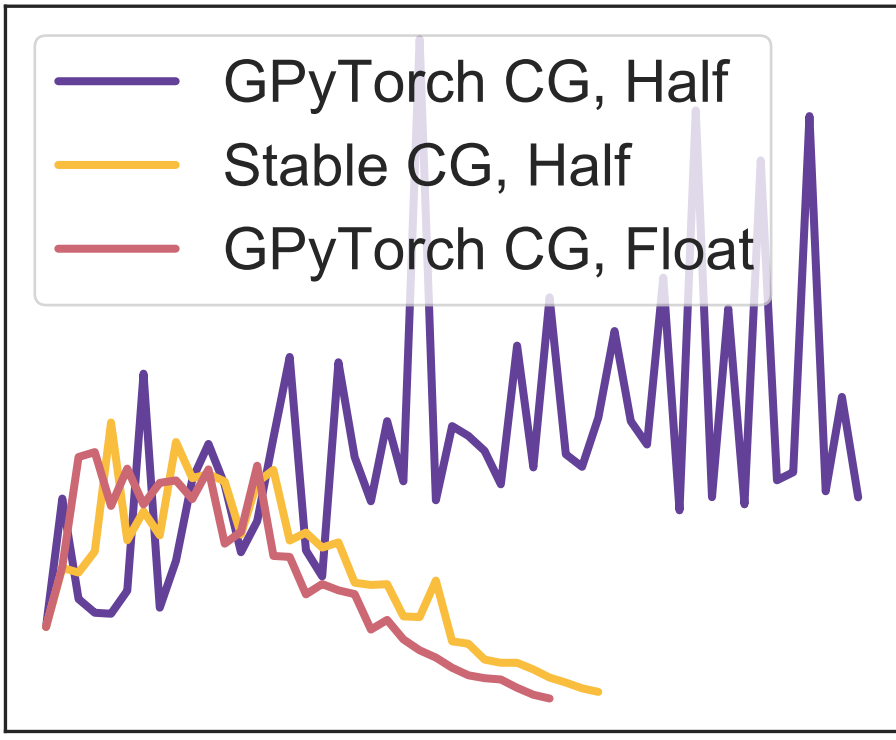

Supplement: supplementary_material [file attachment]

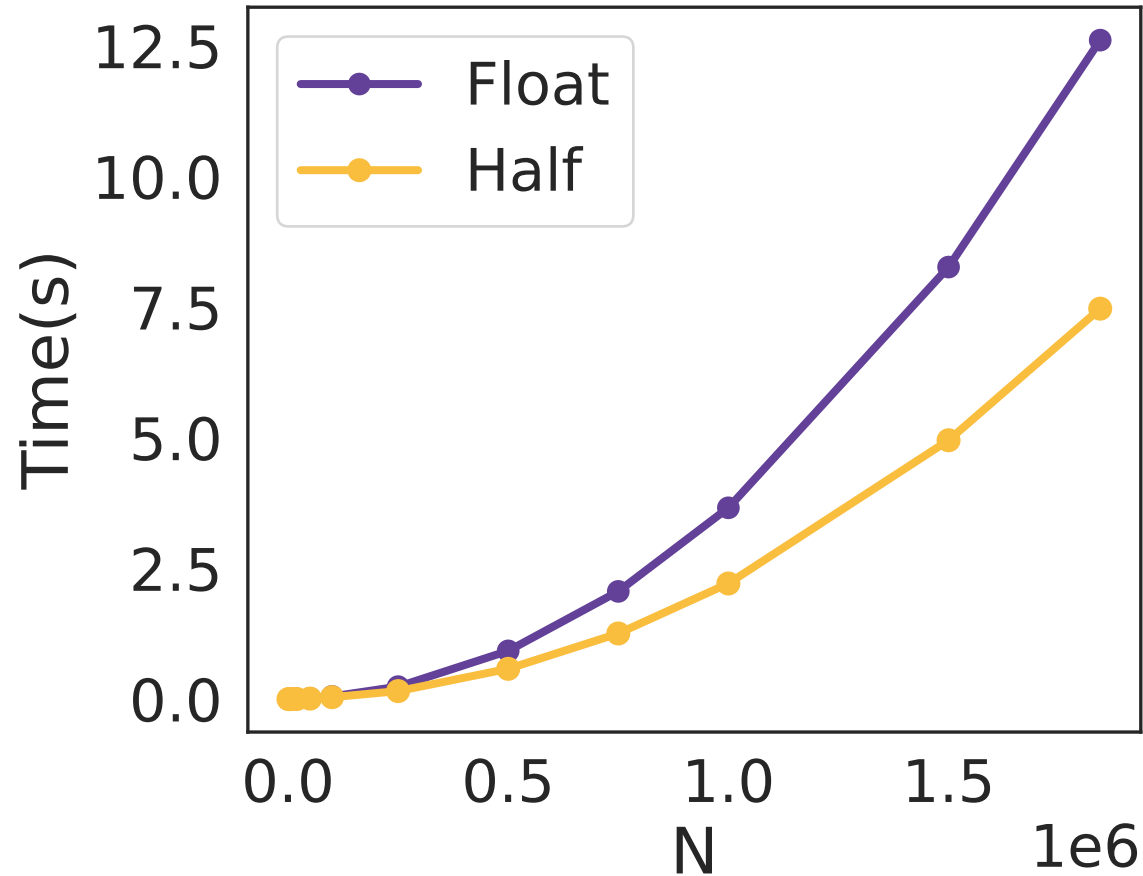

Supplement: supplementary_material [file attachment]

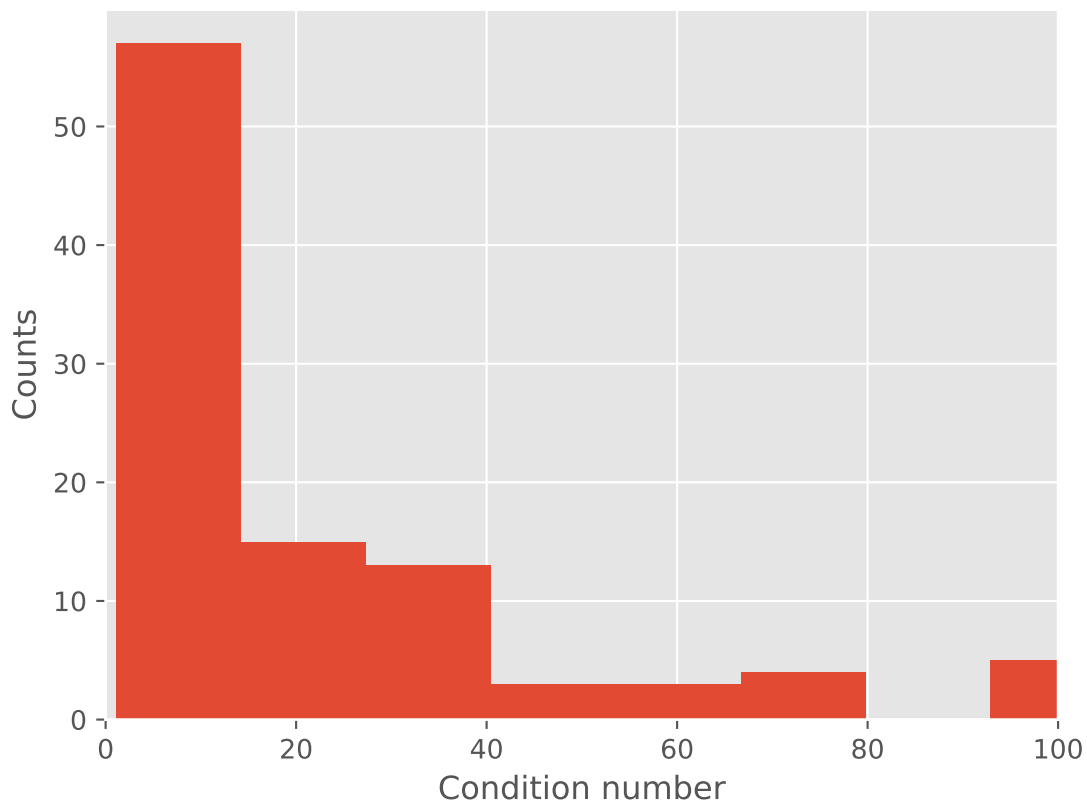

Supplement: supplementary_material [file attachment]

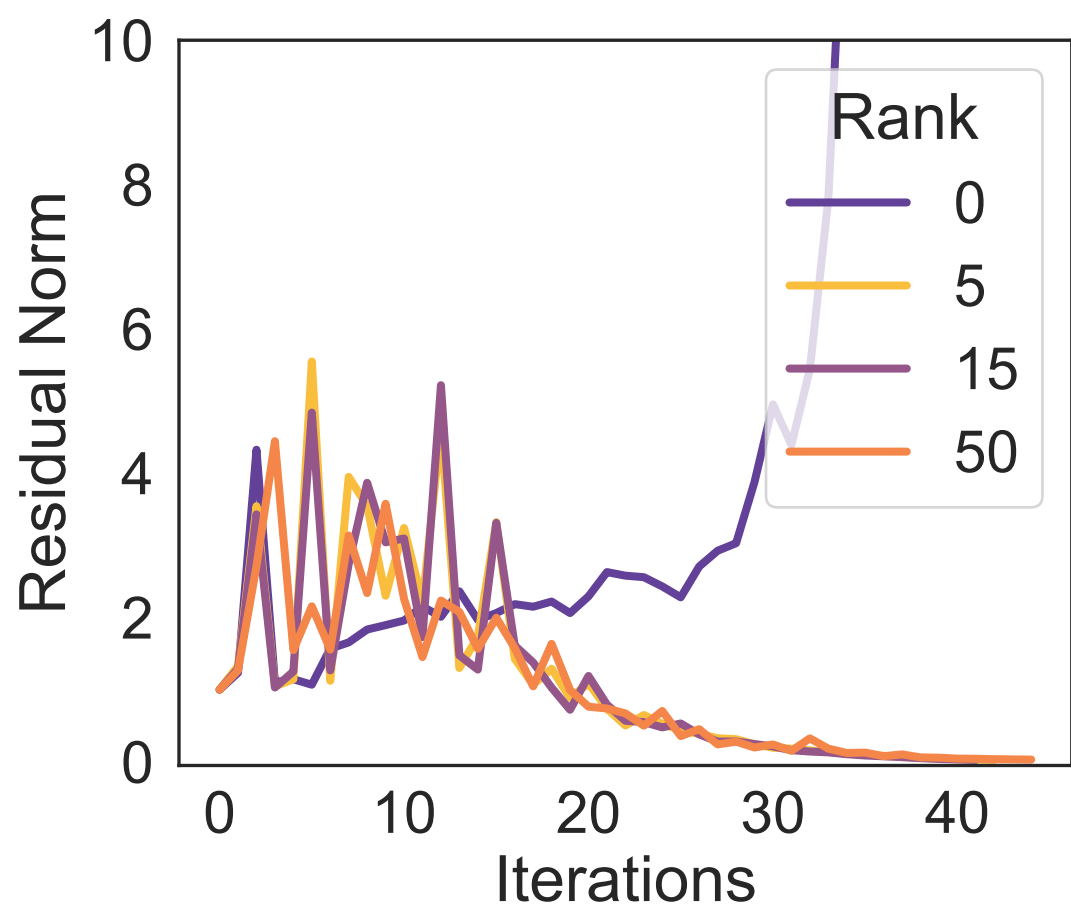

Supplement: supplementary_material [file attachment]

## Elevators

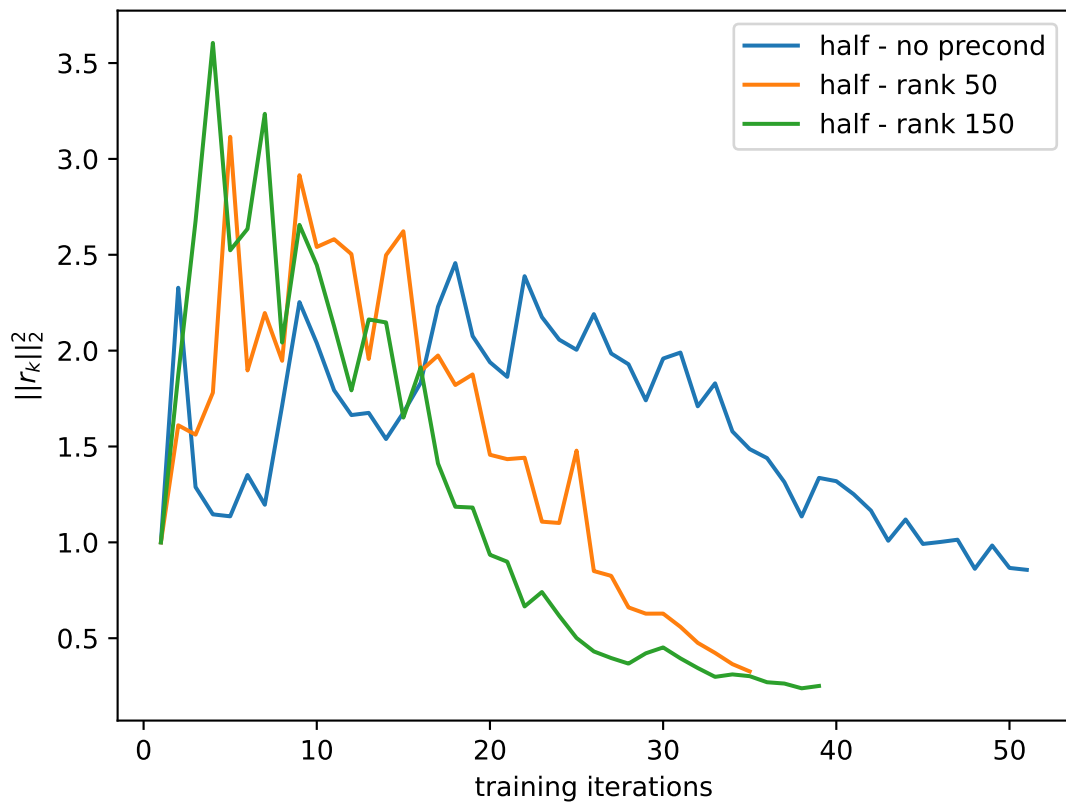

Supplement: supplementary_material [file attachment]

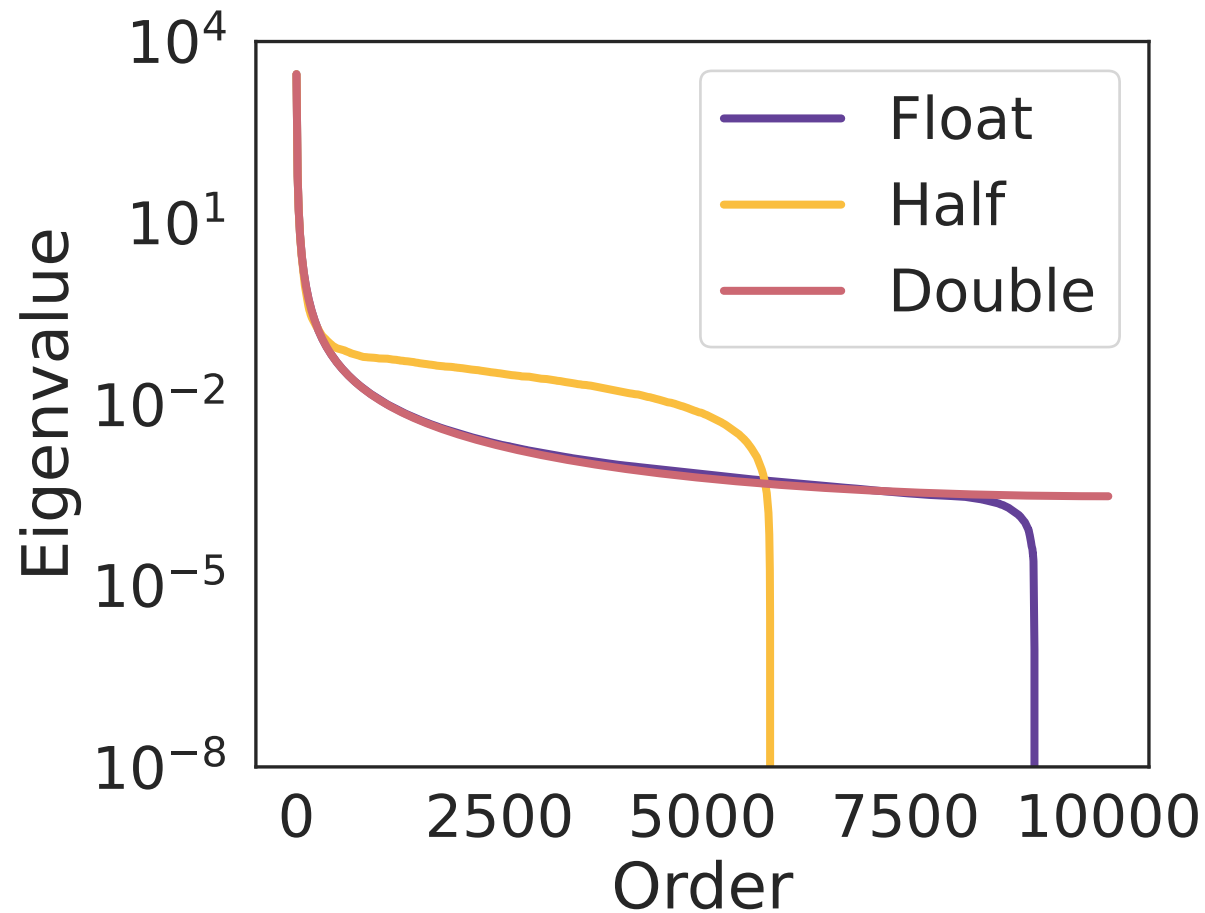

Supplement: supplementary_material [file attachment]

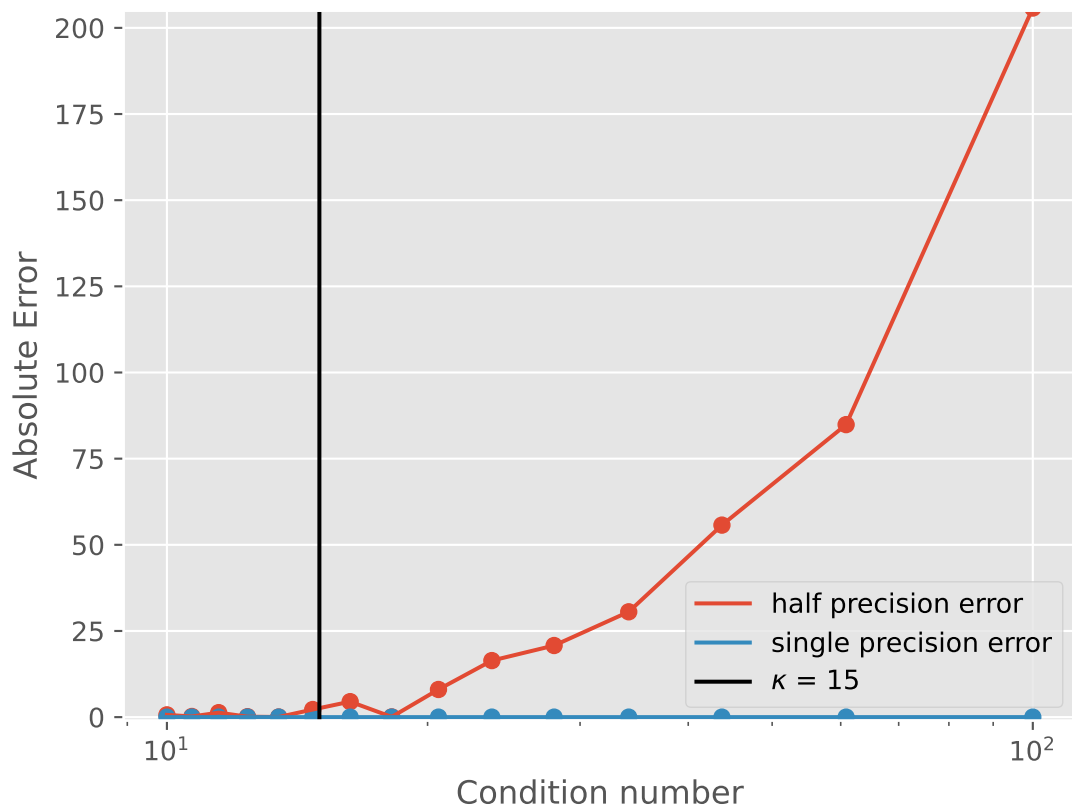

Supplement: supplementary_material [file attachment]

KeggD

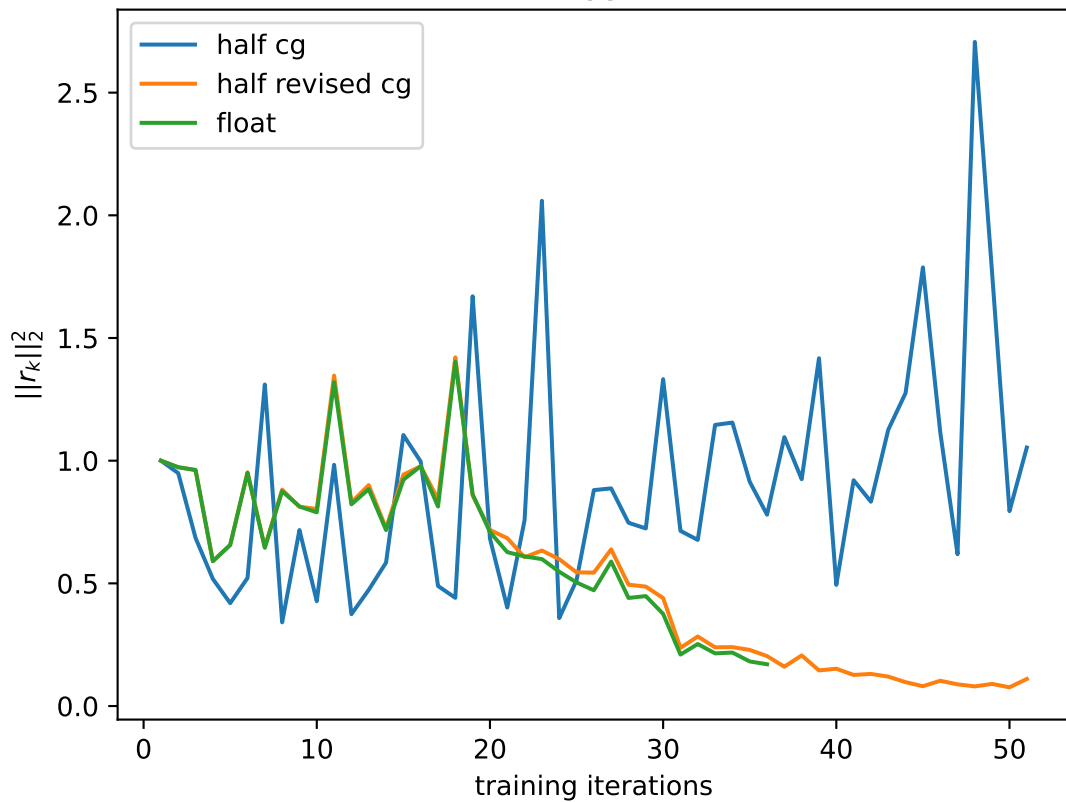

Supplement: supplementary_material [file attachment]

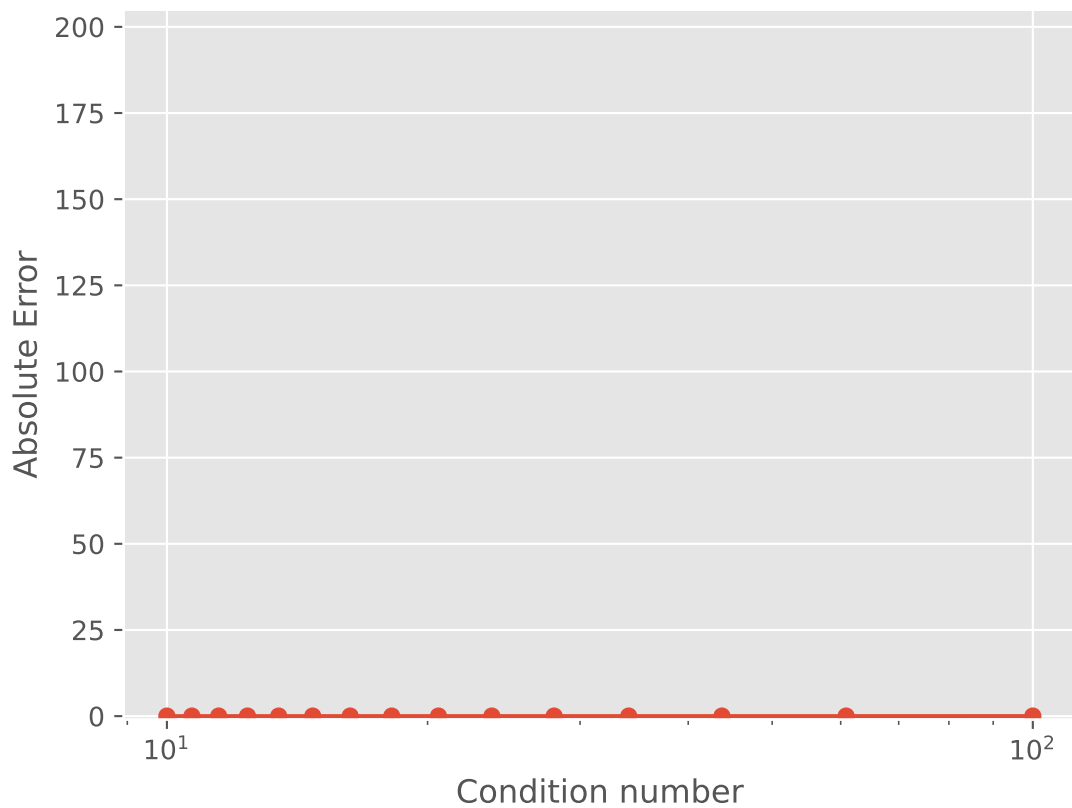

Supplement: supplementary_material [file attachment]

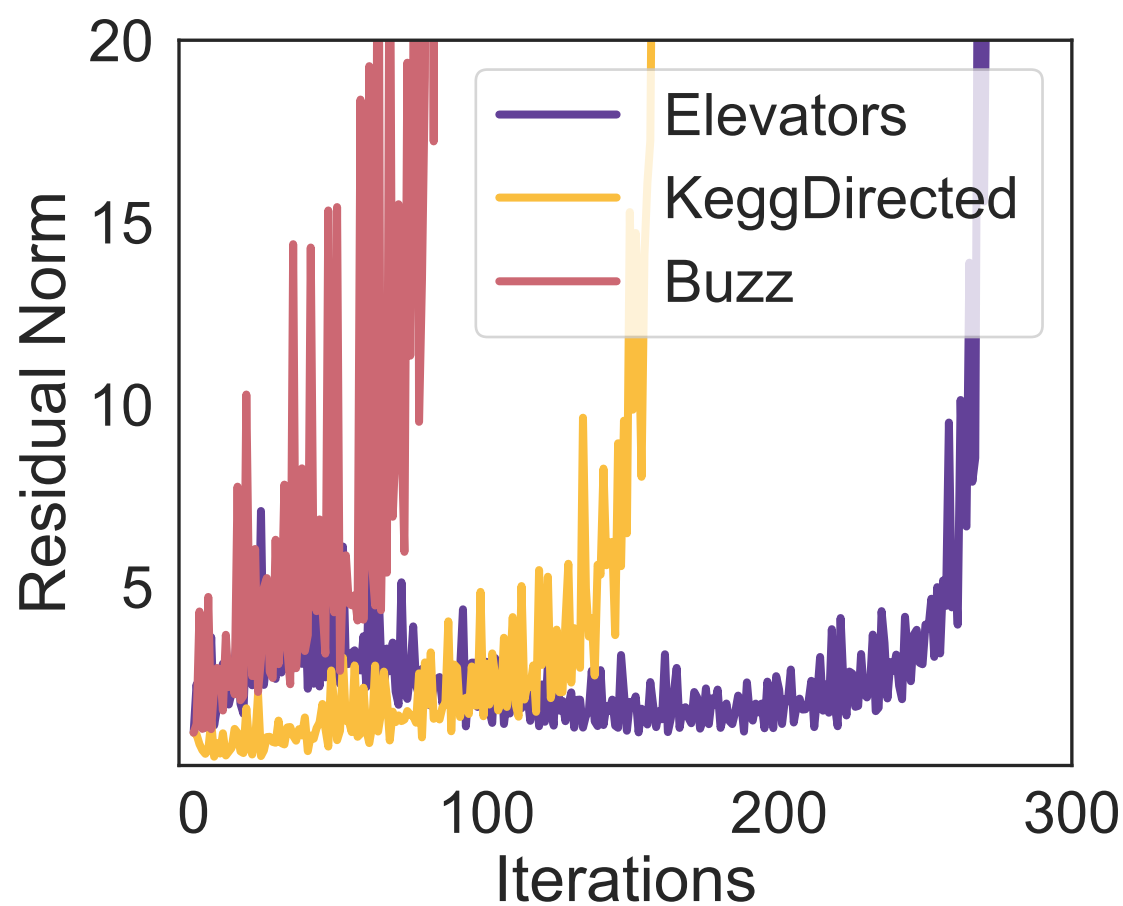

Supplement: supplementary_material [file attachment]

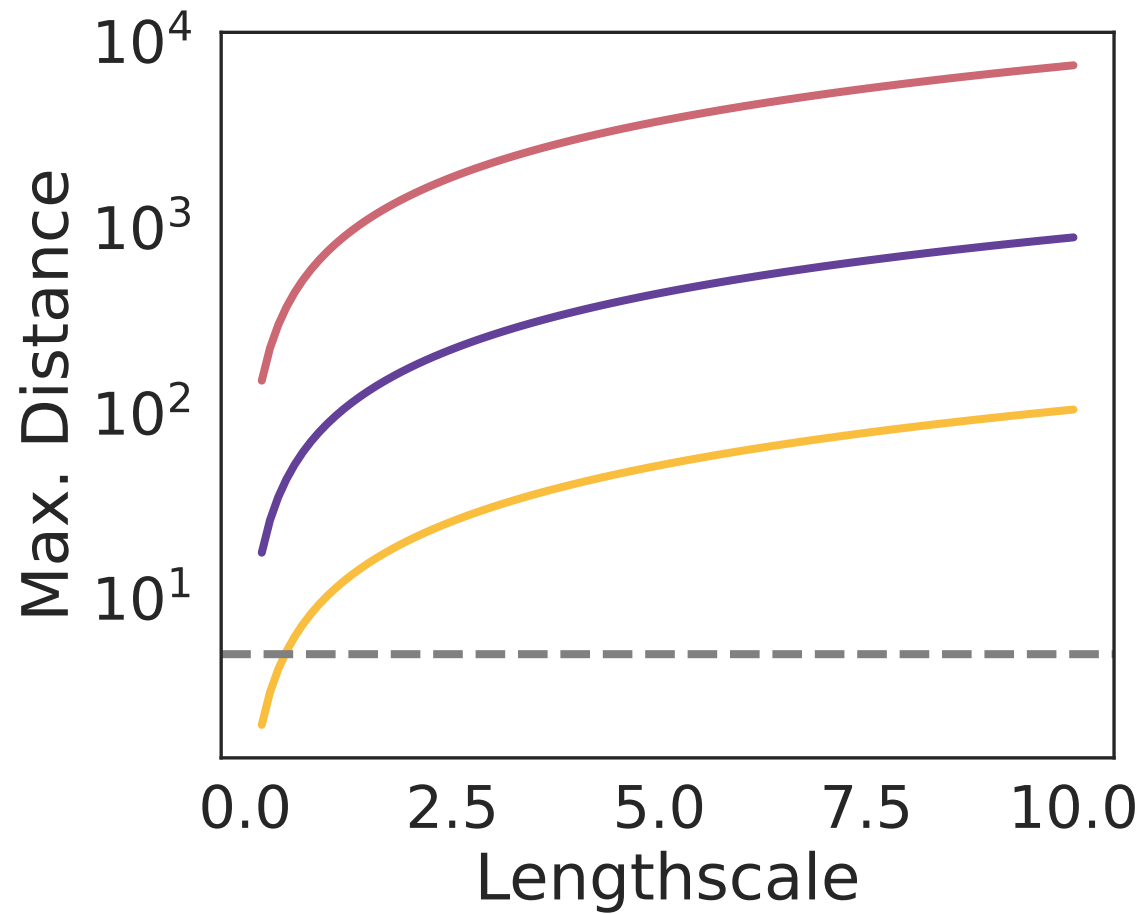

Supplement: supplementary_material [file attachment]

Residual Norm

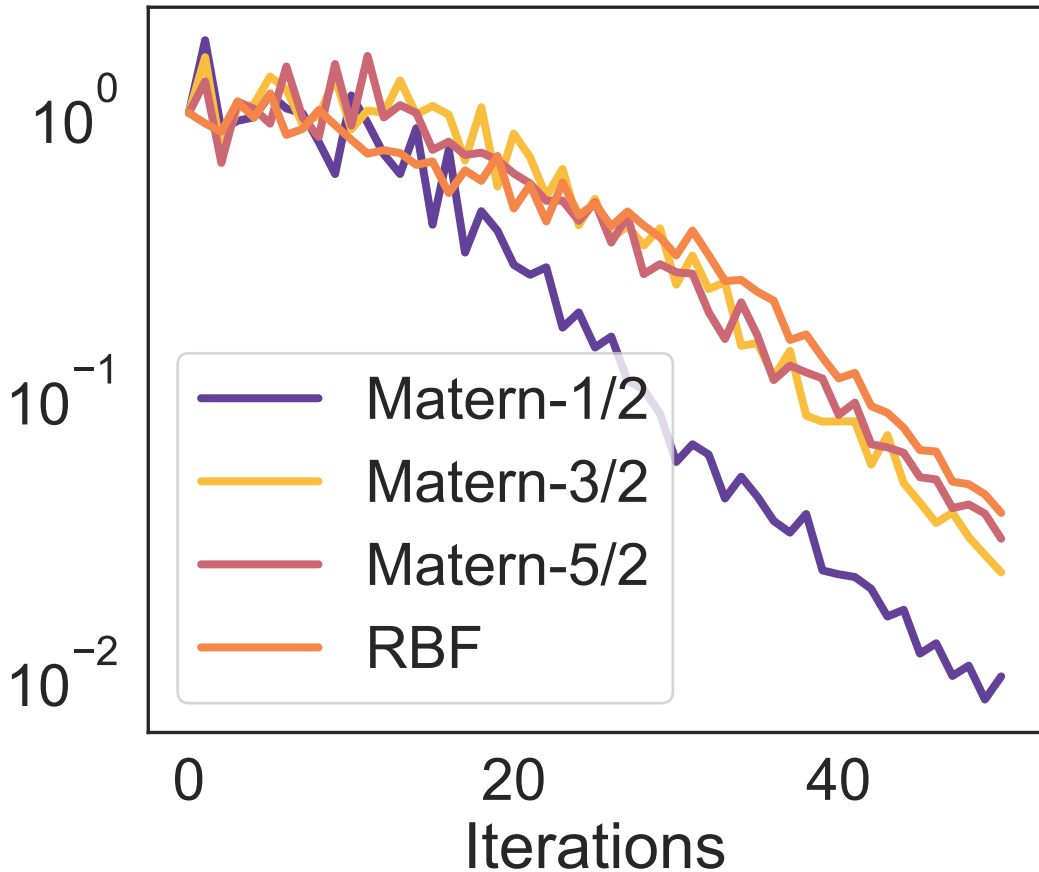

Supplement: supplementary_material [file attachment]

KeggD

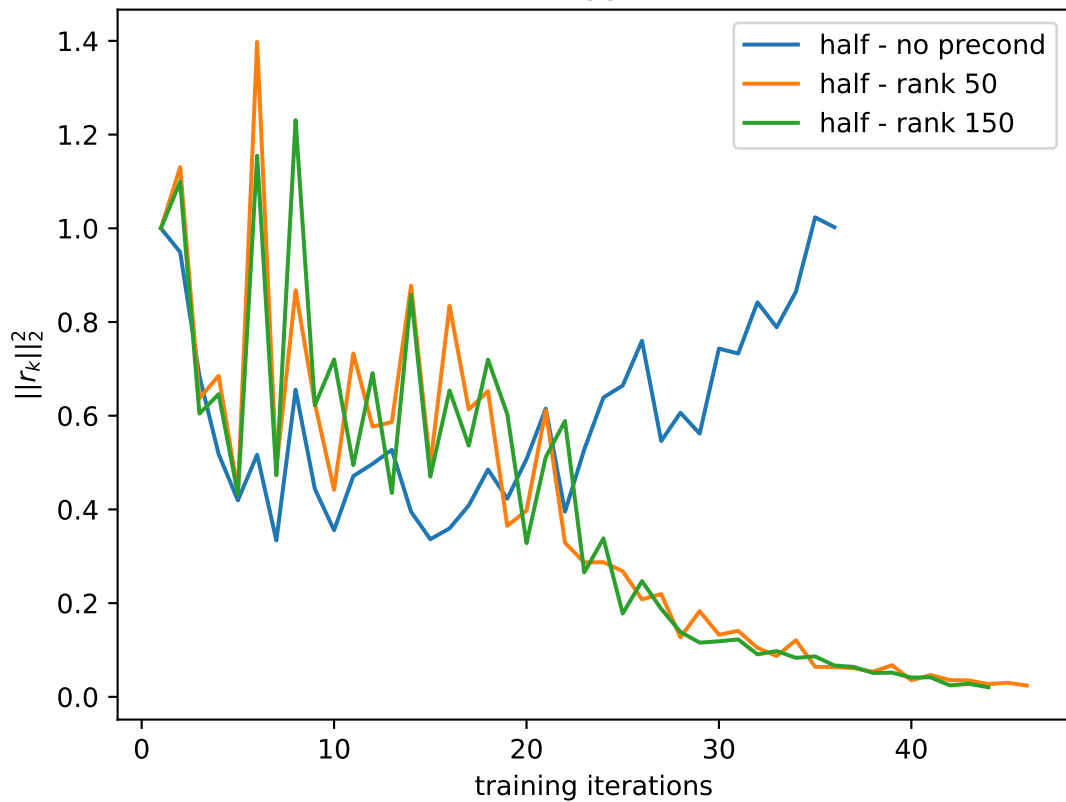

Supplement: supplementary_material [file attachment]

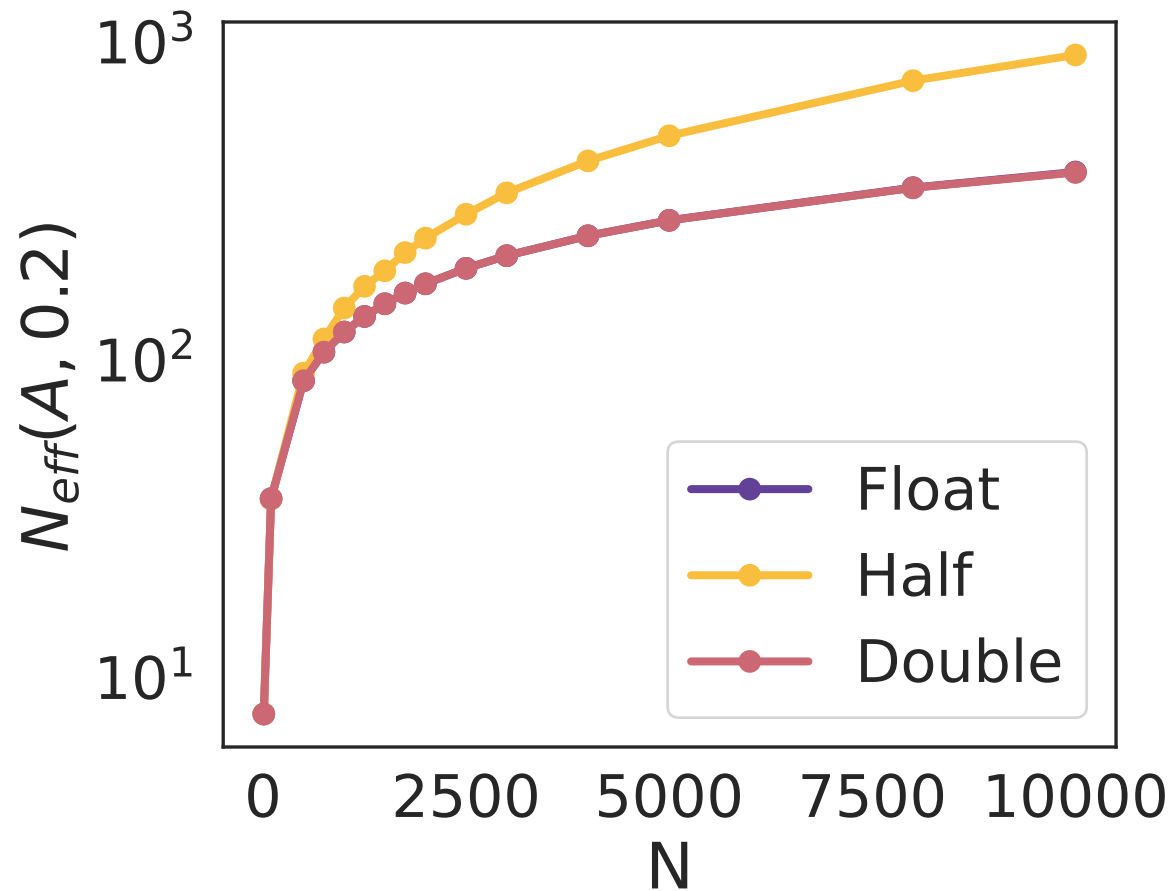

Supplement: supplementary_material [file attachment]

Relative Error

- Block sum, Float
- Block sum, Half
- Kahan sum, Half

$10^{-1}$

$10^{-2}$

$10^{-3}$

$10^3$

$10^4$

$10^5$

$10^6$

N

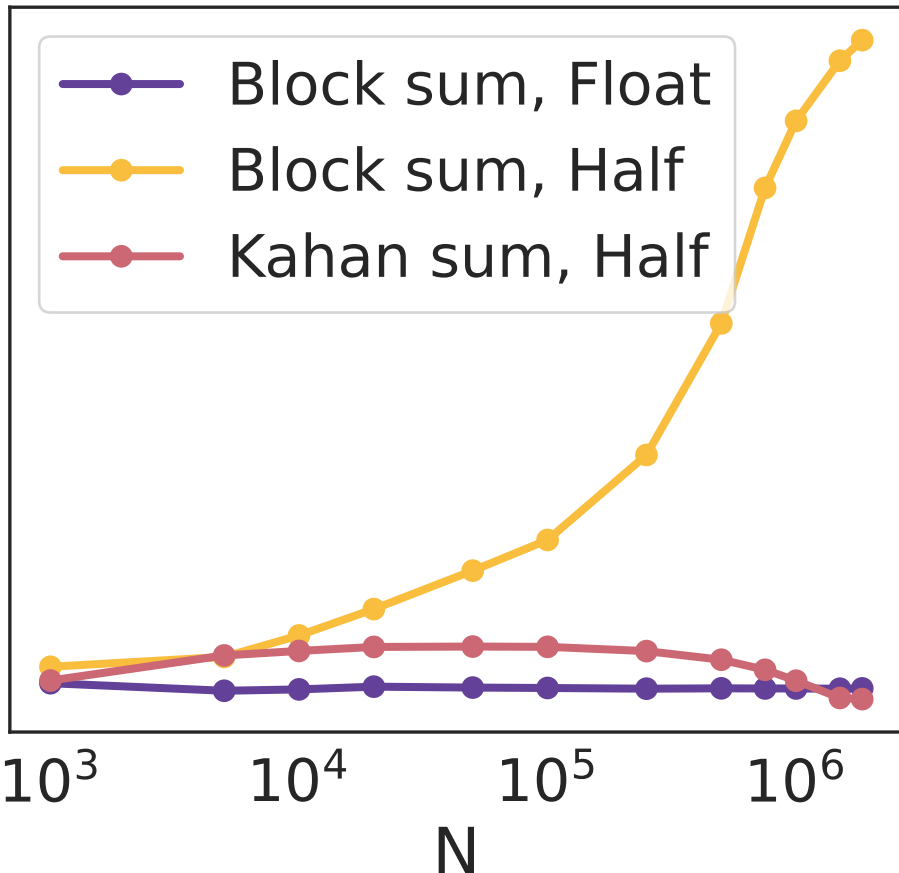

Supplement: supplementary_material [file attachment]

Max. Distance

$10^2$

$10^1$

$10^0$

0.0

2.5

5.0

7.5

10.0

Lengthscale

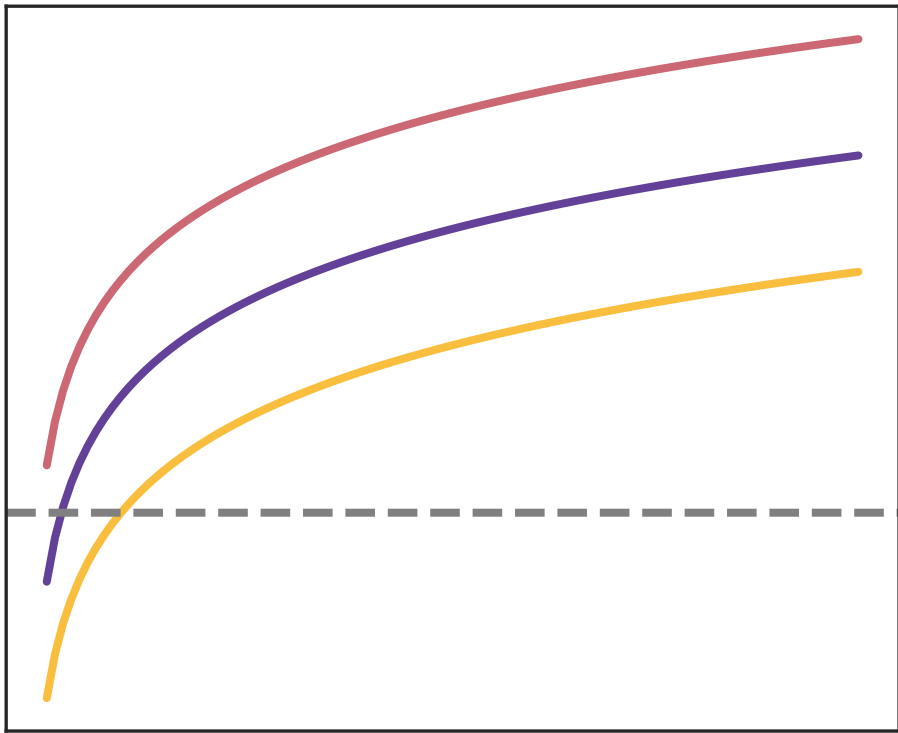

Supplement: supplementary_material [file attachment]

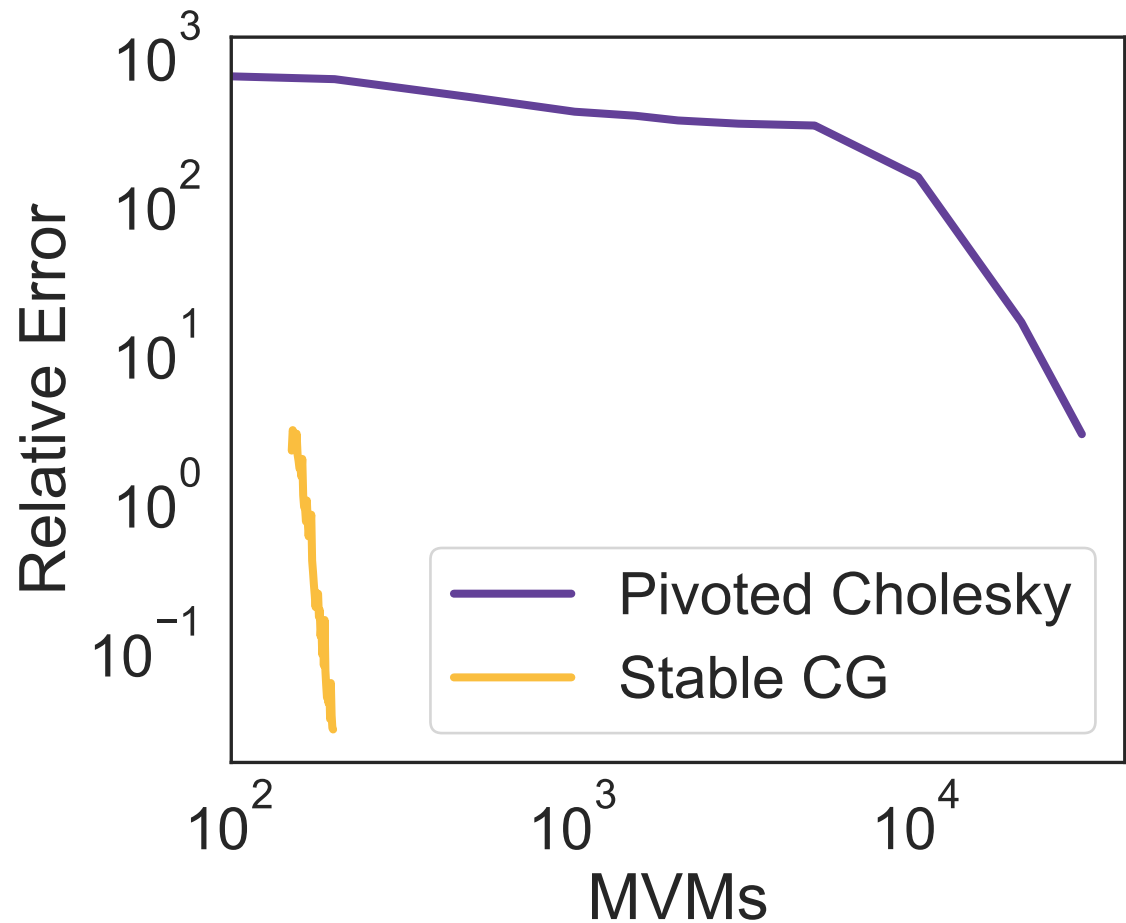

Supplement: supplementary_material [file attachment]

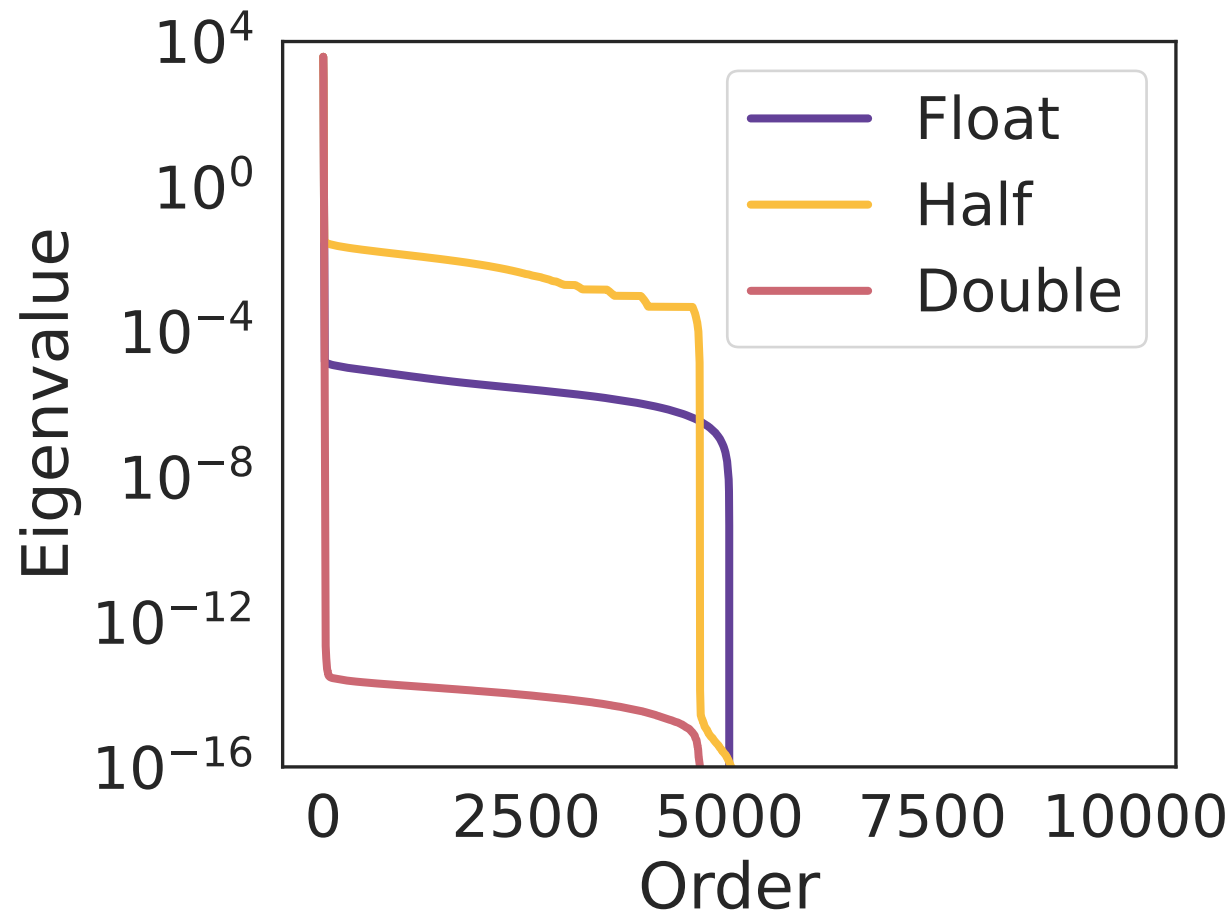

Supplement: supplementary_material [file attachment]

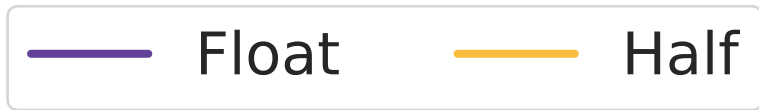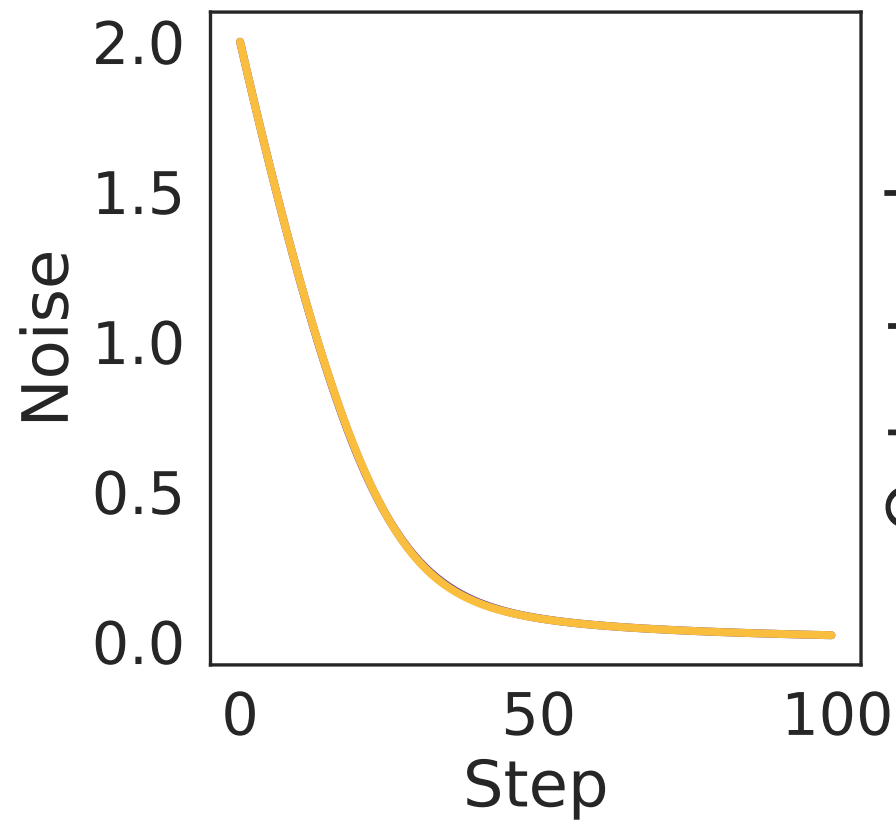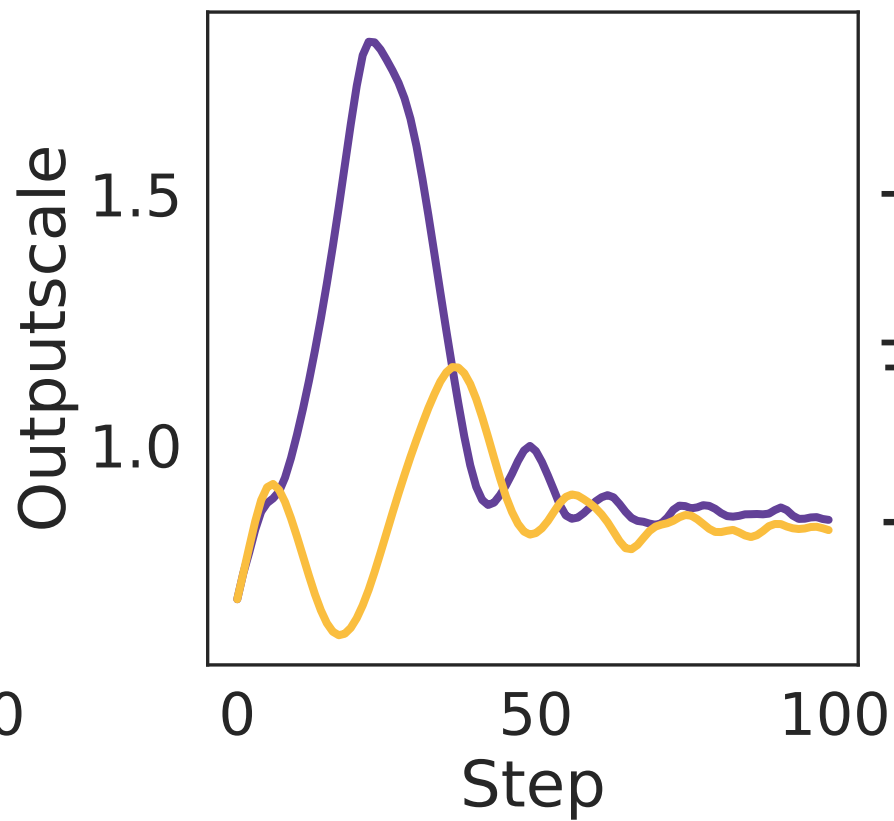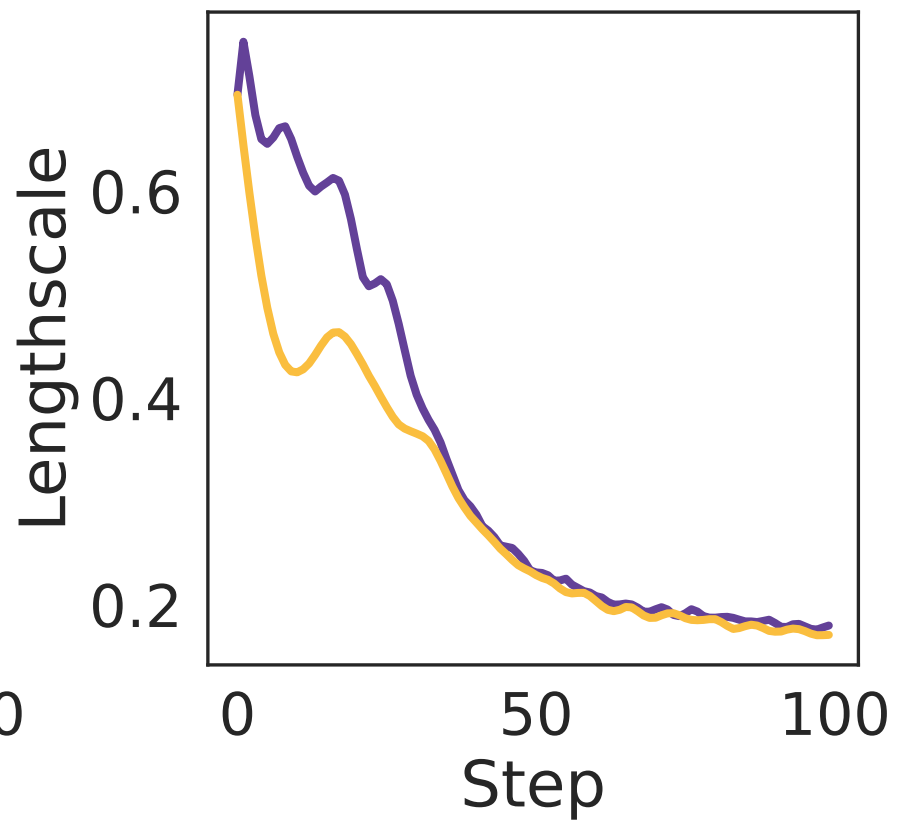

Supplement: supplementary_material [file attachment]
